# The role of dopamine in reward-based motor adaptation, savings, and interference

**Abbreviated Title:** Dopamine in motor adaptation

Dimitrios J. Palidis<sup>1,2,3</sup>, Heather R. McGregor<sup>1,2,3</sup>, Andrew Vo<sup>1,2</sup>, Penny, A. Macdonald<sup>1,2,3,6</sup>, Paul L. Gribble<sup>1,2,4,5,\*</sup>

1. The Brain and Mind Institute, Western University, London, ON, N6A 57B, Canada
  2. Dept. Psychology, Western University, London, ON, N6A 5C2, Canada
  3. Graduate Program in Neuroscience, Schulich School of Medicine & Dentistry, Western University, London, ON, N6A 3K7, Canada
  4. Dept. Physiology & Pharmacology, Schulich School of Medicine & Dentistry, Western University, London, ON, N6A 5C1 Canada
  5. Haskins Laboratories, New Haven, CT, 06511, USA
  6. Department of Clinical Neurological Sciences, University of Western Ontario, London, ON, N6A 5A5, Canada
- \* Corresponding author: Paul Gribble, [pgribble@uwo.ca](mailto:pgribble@uwo.ca)

**Author Contributions:** DJP, PLG designed research, DJP performed research, DJP analyzed data, DJP wrote the paper, DJP, PLG edited the paper.

Authors report no conflict of interest.

**Funding sources:** This work was supported by the Natural Science and Engineering Council of Canada RGPIN-2018-05458 to P.L.G. DJP was supported by a graduate scholarship from NSERC.

**Keywords:** motor adaptation, reward, reinforcement, FRN, reward positivity, dopamine

## 30 **Abstract**

31

32 Dopamine signaling is thought to mediate reward-based learning. We tested for a role of  
33 dopamine in motor adaptation by administering the dopamine precursor levodopa to healthy  
34 participants in two experiments involving reaching movements. Levodopa has been shown to  
35 impair reward-based learning in cognitive tasks. Thus, we hypothesized that levodopa would  
36 selectively impair aspects of motor adaptation that depend on reinforcement of rewarding  
37 actions.

38

39 In the first experiment, participants performed two separate tasks in which adaptation was  
40 driven either by visual feedback of the hand position or binary reward feedback. We used EEG  
41 to measure event-related potentials evoked by task feedback. We hypothesized that levodopa  
42 would specifically diminish adaptation and the neural responses to feedback in the reward  
43 learning task. However, levodopa did not affect motor adaptation in either task nor did it  
44 diminish event-related potentials elicited by reward outcomes.

45

46 In the second experiment, participants learned to compensate for mechanical force field  
47 perturbations applied to the hand during reaching. Previous exposure to a particular force field  
48 can result in savings during subsequent adaptation to the same force field and interference  
49 during adaptation to an opposite force field. We hypothesized that levodopa would diminish  
50 savings and anterograde interference, as previous work suggests that these phenomena result  
51 from a reinforcement learning process. However, we found no reliable effects of levodopa.

52

53 These results suggest that reward-based motor adaptation, savings, and interference may not  
54 depend on the same dopaminergic mechanisms which have been shown to be disrupted by  
55 levodopa during various cognitive tasks.

56

## 57 **New and Noteworthy**

58

59 Motor adaptation relies on multiple processes including reinforcement of successful actions.  
60 Cognitive reinforcement learning is impaired by levodopa-induced disruption of dopamine  
61 function. We administered levodopa to healthy adults who participated in multiple motor  
62 adaptation tasks. We found no effects of levodopa on any component of motor adaptation. This  
63 suggests that motor adaptation may not depend on the same dopaminergic mechanisms as  
64 cognitive forms or reinforcement learning which have been shown to be impaired by levodopa.

## 65 Introduction

66

67 Human motor control is adaptive to changes of the environment and the body through multiple  
68 mechanisms including reinforcement of successful actions and recalibration of internal  
69 mappings between motor commands and sensory outcomes (Taylor and Ivry 2014; Huang et al.  
70 2011; Wolpert, Ghahramani, and Jordan 1995). Two prominent experimental models of motor  
71 learning have been used in recent work in this area: force field adaptation and visuomotor  
72 rotation (VMR) tasks. In studies of force field adaptation a robot applies velocity-dependent  
73 forces to the hand during reaches to targets. In visuomotor rotation tasks, a cursor on a digital  
74 display represents the position of the hand, and the mapping between the actual reach angle  
75 and the position of the cursor is rotated to induce errors. In both tasks participants quickly adapt  
76 their movements to compensate for the experimentally induced perturbations (i.e., external  
77 forces or visual feedback rotation, respectively). Learning is thought to rely primarily on circuits  
78 involving the cerebellum, and parietal, sensory, and motor cortical areas (Tanaka, Sejnowski,  
79 and Krakauer 2009; Diedrichsen et al. 2005; Mathis, Mathis, and Uchida 2017; Kumar,  
80 Manning, and Ostry 2019; Ostry and Gribble 2016; Wong et al. 2019; Taylor, Klempfuss, and Ivry  
81 2010; Smith and Shadmehr 2005; Ito 2000; Krakauer et al. 2004). Theories of adaptation state  
82 that activity within these neural circuits guides movement by representing a predictive mapping  
83 between motor commands and sensory consequences in visual or proprioceptive space (Miall  
84 et al. 2007; Wolpert, Ghahramani, and Jordan 1995; Bhanpuri, Okamura, and Bastian 2013).  
85 When experimental perturbations produce unexpected sensory consequences, it is thought that  
86 a sensory prediction error is computed that drives updating of the sensory-motor mapping to  
87 produce adaptation (Tseng et al. 2007; Therrien and Bastian 2015; Adams, Shipp, and Friston  
88 2013; Izawa and Shadmehr 2011; Shadmehr, Smith, and Krakauer 2010; Synofzik, Lindner, and  
89 Thier 2008).

90

91 While sensory error-based learning mechanisms are dominant in typical motor adaptation  
92 paradigms, influences of reinforcement learning processes are increasingly recognized as  
93 important (Izawa and Shadmehr 2011; Cashaback et al. 2019; Palidis, Cashaback, and Gribble  
94 2019; Nikooyan and Ahmed 2015; van der Kooij and Smeets 2019; van der Kooij et al. 2018;  
95 Kim, Parvin, and Ivry 2018, 2019; McDougle et al. 2016; Bernardi, Darainy, and Ostry 2015;  
96 Sidarta et al. 2016; Sidarta, van Vugt, and Ostry 2018). In some cases, sensory error-based  
97 learning is influenced by reinforcement outcomes. Explicit reward feedback has been shown to  
98 enhance the retention of error-based learning, while punishment feedback accelerates  
99 acquisition (Shmuelof et al. 2012; Galea et al. 2015; Kuling et al. 2019). Sensory error-based  
100 learning can also be modulated by implicit reward or task errors related to whether feedback hits  
101 or misses visual targets (Kim, Parvin, and Ivry 2019; Leow et al. 2018). Reinforcement learning  
102 and sensory error-based learning can also contribute to adaptation as separable processes.  
103 Adaptation to sensory error has been shown to occur automatically even when it interferes with  
104 the instrumental goals of the task, supporting a distinction between reinforcement of successful  
105 actions and sensory error-based learning (Mazzoni and Krakauer 2006). Reward-based  
106 adaptation can be isolated experimentally by providing only binary reinforcement feedback,  
107 which indicates success or failure. This produces learning with perceptual and behavioral  
108 signatures that are different from those observed during visuomotor adaptation (Izawa and

109 Shadmehr 2011; Shmuelof et al. 2012). When sensory error-based learning cannot occur due to  
110 impoverished sensory feedback or cerebellar damage, reward-based learning can produce  
111 comparable behavioral adaptation (Izawa and Shadmehr 2011; Cashaback et al. 2017;  
112 Therrien, Wolpert, and Bastian 2016). Although sensory error-based learning can correct biases  
113 that affect average motor error, a reinforcement learning process may be necessary to discover  
114 motor solutions that minimize the variance of motor error, a hallmark of motor skill acquisition  
115 (Mehler et al. 2017).

116

117 Dopamine plays a nearly ubiquitous role in reward-based learning across species and  
118 behaviours. In formal models of reinforcement learning, the difference in reward between  
119 expected and received outcomes is known as reward prediction error (Daw and Tobler 2014;  
120 Walsh and Anderson 2012; Sambrook and Goslin 2015). When an action results in an outcome  
121 that is better or worse than expected, reward prediction error serves to update a representation  
122 of that action's value accordingly. Phasic changes in the firing rate of midbrain dopamine  
123 neurons show concordance with reward prediction error signals predicted by computational  
124 models of reinforcement learning (Schultz, Dayan, and Montague 1997; García-García,  
125 Zeighami, and Dagher 2017; Watabe-Uchida, Eshel, and Uchida 2017; Jocham and Ullsperger  
126 2009; Bayer and Glimcher 2005). These dopaminergic signals are thought to mediate synaptic  
127 plasticity in the striatum and frontal cortex, which underlies reward-based learning (Otani et al.  
128 2003; Wang et al. 2018; Reynolds and Wickens 2002).

129

130 Levodopa is a dopamine precursor commonly used to treat Parkinson's disease. In  
131 experimental studies of reinforcement learning, levodopa often impairs reward-based learning in  
132 both patients and healthy participants (Vo, Seergobin, and MacDonald 2018; R. Cools et al.  
133 2001; Roshan Cools et al. 2003; Roshan Cools, Altamirano, and D'Esposito 2006; Roshan  
134 Cools et al. 2007; Feigin et al. 2003; Frank, Seeberger, and O'reilly 2004; Graef et al. 2010;  
135 Hiebert et al. 2014; Jahanshahi et al. 2010; Kwak et al. 2010; MacDonald et al. 2011; Swainson  
136 et al. 2000; Torta et al. 2009; Vo et al. 2014). According to the "dopamine overdose" hypothesis,  
137 dopamine levels affect performance in tasks which depend on the ventral striatum according to  
138 an inverted-u function (Roshan Cools, Altamirano, and D'Esposito 2006). In Parkinson's  
139 disease, the dorsal striatum is significantly depleted of dopamine whereas the ventral striatum is  
140 comparatively spared, particularly at earlier disease stages. Dopaminergic therapy is predicted  
141 to ameliorate deficits caused by dopamine-depletion in the dorsal striatum but to worsen  
142 functions ascribed to the less-affected ventral striatum. In line with this view, reward-based  
143 learning is thought to rely on dopamine signaling in ventral striatum and is impaired by levodopa  
144 in both healthy participants and patients with early stage Parkinson's disease.

145

146 Dopamine is widely implicated in biological reinforcement learning, and reward-based motor  
147 adaptation has been successfully modeled as a reinforcement learning process (Izawa and  
148 Shadmehr 2011; Dhawale et al. 2019). However, it is unknown whether the general role of  
149 dopamine in learning extends to human motor adaptation. Here we administered levodopa to  
150 healthy young participants to manipulate dopamine function and test for effects on motor  
151 adaptation. In our first experiment, participants received levodopa and placebo in separate  
152 sessions using a repeated measures design. Both sessions included a reward-based learning

153 task and a sensory error-based VMR task, similar to those used in a previous experiment  
154 (Palidis, Cashaback, and Gribble 2019). In the reward-based learning task, adaptation was  
155 induced through binary reinforcement feedback at the end of each movement. We measured  
156 changes in the mean reach angle due to reinforcement as well as modulations in trial-by-trial  
157 variability of reach angle as a response to reward outcomes. Previous research has shown that  
158 motor variability is larger following unrewarded outcomes compared to rewarded outcomes  
159 (Pekny, Izawa, and Shadmehr 2015; Dhawale et al. 2019; van Mastrigt, Smeets, and van der  
160 Kooij 2019; van der Kooij and Smeets 2019; Holland, Codol, and Galea 2018). Reinforcement of  
161 successful actions should be reflected in reduced variability following reward (Cashaback et al.  
162 2019). Following non-reward, an increase in variability is linked to motor exploration in search of  
163 more rewarding actions (Dhawale, Smith, and Ölveczky 2017). This exploratory modulation of  
164 variance has been shown to be impaired in individuals with Parkinson's Disease who are  
165 medicated, but it remains unclear whether this deficit is caused by the disease process itself or  
166 off-target effects of dopaminergic medication (Pekny, Izawa, and Shadmehr 2015). We  
167 hypothesized that reward-based motor adaptation relies on dopaminergic signaling of reward  
168 prediction error. We predicted that levodopa would impair reward-based motor adaptation and  
169 modulation of trial-by-trial variability in accordance with the "dopamine overdose hypothesis".

170  
171 In the sensory error-based learning task, participants adapted to visuomotor rotation  
172 perturbations which were designed to produce sensory prediction error while minimizing reward  
173 prediction error. We hypothesized that sensory error-based learning would be unaffected by  
174 levodopa, as it is thought to be mediated by non-dopaminergic mechanisms dependent primarily  
175 on the cerebellum.

176  
177 In experiment 1, we recorded EEG to measure the neural event-related potential (ERP)  
178 correlates of reward and sensory error processing. We were particularly interested in a medial  
179 frontal ERP component called the feedback related negativity, or alternatively the reward  
180 positivity (FRN/RP). In a previous experiment, we found that the FRN/RP was modulated by  
181 reward feedback but not sensory error feedback during motor adaptation (Palidis, Cashaback,  
182 and Gribble 2019). This is consistent with the "reinforcement learning theory of the FRN/RP",  
183 which suggests that it reflects reward prediction error signals in the anterior cingulate cortex  
184 driven by dopamine release (Walsh and Anderson 2012; Sambrook and Goslin 2015, 2016;  
185 Holroyd and Coles 2002; Warren et al. 2015; Becker et al. 2014; Vezoli and Procyk 2009;  
186 Miltner, Braun, and Coles 1997; Emeric et al. 2008; Hauser et al. 2014; Gehring and Willoughby  
187 2002; Mathewson et al. 2008; Carlson et al. 2011; Foti et al. 2011; Holroyd, Pakzad-Vaezi, and  
188 Krigolson 2008). Previously, some studies using pharmacological and genetic techniques have  
189 supported a dopaminergic basis for the FRN/RP (Schutte et al. 2020; Santesso et al. 2009;  
190 Enge et al. 2017; Mueller et al. 2014; Marco-Pallarés et al. 2009). However, at least one study  
191 failed to detect effects of dopaminergic manipulation on the FRN (Forster et al. 2017). Overall,  
192 direct evidence for a link between dopamine and the FRN/RP is limited, and no studies have  
193 investigated this link in the context of motor adaptation. We hypothesized that levodopa would  
194 diminish the magnitude of the FRN/RP along with behavioral expression of reward-based  
195 learning in accordance with the "dopamine overdose" hypothesis.

196

197 In experiment 2, participants ingested either levodopa or placebo prior to undergoing a force  
198 field adaptation paradigm. Our paradigm was designed to test for effects of levodopa on  
199 savings, in which adaptation is facilitated when a particular perturbation is encountered a  
200 second time after washout of initial learning. We also tested for effects of levodopa on  
201 anterograde interference, in which adaptation to a force field in a particular direction causes  
202 interference with subsequent adaptation to an opposite-direction force field (Huang et al. 2011;  
203 Leow et al. 2013; Krakauer, Ghez, and Ghilardi 2005; Sing and Smith 2010; Miall, Jenkinson,  
204 and Kulkarni 2004; Bock, Schneider, and Bloomberg 2001). While force field adaptation is  
205 thought to rely primarily on sensory error-based learning mechanisms, savings and anterograde  
206 interference can be accounted for by additional influences of a reinforcement learning process  
207 (Huang et al. 2011). Individuals with Parkinson's disease often exhibit deficits in operant  
208 reinforcement and show reduced savings and interference despite intact initial adaptation (Leow  
209 et al. 2013; Leow, Loftus, and Hammond 2012; Bédard and Sanes 2011). While these results  
210 suggest a role of dopamine in savings and interference, they cannot distinguish between effects  
211 of Parkinson's disease and "dopamine overdose" effects of medication. We used  
212 pharmacological manipulation in healthy participants to provide a more specific and controlled  
213 test for a role of dopamine in savings and interference. We predicted that levodopa would impair  
214 savings and interference while leaving initial adaptation unaffected, as levodopa has been  
215 shown to impair reinforcement learning processes in healthy participants.

216  
217 We tested for effects of levodopa using a comprehensive battery of motor adaptation tasks  
218 which rely on various behavioral processes including reward-based learning, motor exploration,  
219 sensory error-based learning, savings, and anterograde interference. This allowed us to test the  
220 hypotheses that dopaminergic mechanisms specifically underlie adaptive motor responses to  
221 reward outcomes as well as the formation of motor memories that produce savings and  
222 interference effects. We also measured the FRN/RP using EEG, which is a common neural  
223 correlate of reward prediction error. This allowed us to test the hypothesis that dopaminergic  
224 signaling of reward prediction error in the medial frontal cortex drives reward-based motor  
225 adaptation.

226

## 227 **Methods**

228

### 229 **Experiment 1**

230

#### 231 ***Participants***

232

233 A total of  $n=21$  [12 female, Age: 20.99 years (SD 3.26)] healthy, right-handed participants were  
234 included in experiment 1. All participants were screened for neurological and psychiatric illness,  
235 history of drug or alcohol abuse, and contraindications for levodopa. Two participants were  
236 excluded due to malfunction of the robot that prevented the experiment from being completed,  
237 and two participants were excluded who did not return for the second testing session.

238 Participants provided written informed consent to experimental procedures approved by the  
239 Research Ethics Board at Western University.

240



241 **Experimental design**

242

243 *Drug administration:* All participants underwent two experimental sessions, with levodopa and  
244 placebo being administered in separate sessions using a randomized, double blind, crossover  
245 design. In one session, a capsule was ingested which contained 100 mg of levodopa (L-3,4-  
246 dihydroxyphenylalanine) and 25 mg of carbidopa. Levodopa is a dopamine precursor, and  
247 carbidopa is a decarboxylase inhibitor given to reduce conversion of levodopa to dopamine in  
248 the periphery. This dose has been shown to produce various behavioral effects in healthy young  
249 adults (Vo, Seergobin, and MacDonald 2018; Flöel et al. 2005; Knecht et al. 2004; Onur et al.  
250 2011; Vo et al. 2016; Vo, Seergobin, and MacDonald 2017). In the other session, an equal  
251 volume of placebo was administered in an identical capsule. The order of administration was  
252 counterbalanced. After administration of the capsule, the robot was calibrated, the EEG cap was  
253 placed on the participant's head, and participants performed a practice block of the behavioral  
254 task (see below). Subsequently, the experimental tasks began 45 minutes after ingestion of the  
255 capsule to coincide with peak plasma levels of levodopa (Olanow, Schapira, and Rascol 2000).  
256 We measured subjective alertness using the Bond-Lader visual analog scale (Bond and Lader  
257 1974), as well as heart rate and blood pressure, immediately prior to ingesting the capsule and  
258 again at the end of each session.

259

260 *Overview of behavioral tasks:* Each participant underwent the same experimental tasks in both  
261 sessions. Participants made reaching movements toward a visual target and received visual  
262 feedback pertaining to reach angle only at movement end point. Neural responses to feedback  
263 were recorded by EEG. Participants were instructed that each reach terminating within the  
264 target would be rewarded with a small monetary bonus. Participants first performed a block of  
265 50 practice trials. The subsequent behavioral procedure consisted of two blocks of a reward  
266 learning task and two blocks of a visuomotor rotation (VMR) task. The order of the blocks  
267 alternated between the two task types but was otherwise randomized. Participants took self-  
268 paced rests between blocks.

269

270 In the VMR task, a cursor appeared at movement end point to represent the position of the  
271 hand. In randomly selected trials, cursor feedback indicated a reach angle that was rotated  
272 relative to the true angle of the hand position. This was intended to produce sensory prediction  
273 error and trial-by-trial compensatory changes in reach angle opposite the direction of the  
274 rotations. The rotations were small relative to the size of the target, such that participants nearly  
275 always landed in the target, fulfilling the goal of the task and earning a monetary reward (the  
276 cursor feedback was within the target on 95.5% of trials, SD: 2%). Thus, reward and task error  
277 were constant between perturbed and unperturbed feedback, and by comparing the two  
278 conditions we could isolate the neural correlates of sensory error processing.

279

280 In the reward learning task, no cursor appeared to indicate the position of the hand. Instead,  
281 binary feedback represented whether or not participants succeeded in hitting the target. This  
282 allowed us to assess reward-based learning in isolation from sensory error processing, as visual  
283 information revealing the position of the hand was not provided. In separate blocks, reward  
284 feedback was tailored to produce adaptation towards increasingly clockwise and

285 counterclockwise reach angles. Reward was delivered when the difference between the current  
286 reach angle and the median of the previous 10 reach angles was in the direction of intended  
287 learning. We compared the neural responses to reward and nonreward feedback to assess the  
288 neural correlates of reward processing during adaptation.

289

### 290 ***Apparatus/Behavioral Task***

291

292 Participants produced reaching movements with their right arm while holding the handle of a  
293 robotic arm (InMotion2; Interactive Motion Technologies). Position of the robot handle was  
294 sampled at 600 Hz. A semi-silvered mirror obscured vision of the arm and displayed visual  
295 information related to the task. An air sled supported each participant's right arm. Participants  
296 reached towards a white circular target 14 cm away from a circular start position in front of their  
297 chest. The start position turned from red to green to cue the onset of each reach once the  
298 handle had remained inside it continuously for 750 ms. Participants were instructed that they  
299 must wait for the cue to begin each reach but that it was not necessary to react quickly upon  
300 seeing the cue. Participants were instructed to make forward reaches and to stop their hand  
301 within the target. An arc-shaped cursor indicated reach extent throughout each movement  
302 without revealing reach angle. In only the first five baseline trials of each block, an additional  
303 circular cursor continuously indicated the position of the hand throughout the reach. A viscous  
304 force field assisted participants in braking their hand when the reach extent was 14 cm. The  
305 robot ended each movement by fixing the handle position when the hand velocity decreased  
306 below 0.03 m/s. The hand was fixed in place for 700 ms, during which time visual feedback of  
307 reach angle was provided. Feedback indicated either reach end point position, a binary reward  
308 outcome, or feedback of movement speed (see below). Visual feedback was then removed, and  
309 the robot guided the hand back to the start position. Reach end point was defined as the  
310 position at which the reach path intersected the perimeter of a circle (14-cm radius) centered at  
311 the start position. Reach angle was calculated as the angle between vectors defined by reach  
312 end point and the center of the target, each relative to the start position, such that reaching  
313 straight ahead corresponds to 0° and counterclockwise reach angles are positive.

314

315 Feedback about reach angle was provided either in the form of end-point position feedback or  
316 binary reward feedback. The type of feedback, as well as various feedback manipulations,  
317 varied according to the assigned experimental block type (see Reward Learning Task and  
318 Visuomotor Rotation Task). Participants were told that they would earn additional monetary  
319 compensation for reaches that ended within the target, up to a maximum of CAD\$10. Movement  
320 duration was defined as the time elapsed between the hand leaving the start position and the  
321 moment hand velocity dropped below 0.03 m/s. If movement duration was >700 ms or <450 ms,  
322 no feedback pertaining to movement angle was provided. Instead, a gray arc behind the target  
323 turned blue or yellow to indicate that the reach was too slow or too fast, respectively.

324 Participants were informed that movements with an incorrect speed would be repeated but  
325 would not otherwise affect the experiment. To minimize the impact of eyeblink-related EEG  
326 artifacts, participants were asked to fixate their gaze on a black circular target in the center of  
327 the reach target and to refrain from blinking throughout each arm movement and subsequent  
328 presentation of feedback.



329

330 *Practice block:* Each participant first completed a block of practice trials that continued until they  
331 achieved 50 movements within the desired range of movement duration. Continuous position  
332 feedback was provided during the first 5 trials, and only end-point position feedback was  
333 provided for the following 10 trials. Subsequently, no position feedback was provided outside  
334 the start position.

335

336 *Reward Learning task:* Binary reward feedback was provided to induce adaptation of reach  
337 angle. Each session included two blocks in the reward learning condition. The direction of  
338 intended learning was clockwise in one block and counterclockwise in the other. Each block  
339 continued until the participant completed 125 reaches with acceptable movement duration.  
340 Participants reached toward a circular target 1.2 cm in diameter. The first 11 reaches were  
341 baseline trials during which continuous position feedback was provided during the first 5 trials,  
342 followed by 6 trials with only end-point cursor feedback. After these baseline trials no cursor  
343 feedback was provided, and binary reward feedback was instead provided at the end of the  
344 movement. Target hits and misses were indicated by the target turning green and red,  
345 respectively. Unbeknownst to participants, reward feedback did not necessarily correspond to  
346 the visual target. Instead, reward was delivered if the difference between the current reach  
347 angle and the median angle of the previous 10 reaches was in the direction of intended  
348 learning. When the running median was at least  $6^\circ$  away from zero in the direction of intended  
349 learning, reward was delivered at a fixed probability of 50%. This was intended to minimize  
350 conscious awareness of the manipulation by limiting adaptation to  $6^\circ$ . Reward was never  
351 delivered when the absolute value of the reach angle was greater than  $10^\circ$ , for the same  
352 reason. We employed this adaptive, closed-loop reward schedule so that the overall frequency  
353 of reward was controlled.

354

355 *Visuomotor rotation task:* End-point feedback was rotated relative to the actual reach angle to  
356 induce sensory error-based adaptation. Each session included two blocks in the VMR condition.  
357 Each block continued until participants completed 124 reaches within acceptable movement  
358 duration limits. Participants reached toward a circular target 3.5 cm in diameter. Participants first  
359 performed baseline reaches during which cursor feedback reflected veridical reach angle  
360 continuously for the first 5 trials and only at movement end point for the subsequent 5 trials.  
361 After the baseline reaches the adaptation portion of each block began, unannounced to  
362 participants. During the adaptation trials, end-point position feedback was provided indicating a  
363 reach angle that was rotated relative to the true reach angle. There were 114 total experimental  
364 trials (38 with  $0^\circ$  rotation, and 19 each with  $\pm 2^\circ$  and  $\pm 4^\circ$  rotations). Participants were instructed  
365 that end-point feedback within the target would earn them bonus compensation, but no explicit  
366 reward feedback was provided.

367

### 368 ***EEG data acquisition***

369

370 EEG data were acquired from 16 cap-mounted electrodes with an active electrode system  
371 (g.GAMMA; g.tec Medical Engineering) and amplifier (g.USBamp; g.tec Medical Engineering).  
372 We recorded from electrodes placed according to the 10-20 System at sites Fp1, Fp2, F3, F4,

373 F7, F8, FT9, FT10, FCz, Cz, C3, C4, CPz, CP3, CP4, and Pz referenced to an electrode placed  
374 on participants' left earlobe. Impedances were maintained below 5 k $\Omega$ . Data were sampled at  
375 4,800 Hz and filtered online with band-pass (0.1–1,000 Hz) and notch (60 Hz) filters. A  
376 photodiode attached to the display monitor was used to synchronize recordings to stimulus  
377 onset.

378

### 379 ***Behavioral data analysis***

380

381 *Reward learning task.* To analyze reward-based motor adaptation, we first averaged reach  
382 angles in each block within three bins of 38 trials. We excluded baseline trials and trials that did  
383 not meet the movement duration criteria, as no feedback related to reach angle was provided on  
384 these trials. Each block continued until 114 trials after the baseline period met the movement  
385 duration criteria, so equal numbers of trials were analyzed for each participant. We then  
386 performed 2x2x3 repeated measures ANOVA on reach angle. The factors were bin (levels:  
387 early, middle, late), direction of intended learning (levels: clockwise, counterclockwise), and  
388 drug (levels: placebo, levodopa).

389

390 We also analyzed trial-by-trial variability in reach angle in response to reinforcement feedback  
391 using an approach similar to (Pekny, Izawa, and Shadmehr 2015). First, we calculated trial-by-  
392 trial changes in reach angle as in *Eq. 1*:

393

$$394 \Delta\theta_i = \theta_{i+1} - \theta_i \quad (1)$$

395

396 We then multiplied  $\Delta\theta_i$  by -1 for trials in the clockwise learning condition, so that positive values  
397 for  $\Delta\theta_i$  corresponded to changes in reach angle in the direction of intended learning, and any  
398 biases in  $\Delta\theta$  related to the direction of intended learning would have the same sign in the CW  
399 and CCW learning conditions. Next we conditioned  $\Delta\theta_i$  on the reinforcement outcome of trial  $i$   
400 and the drug condition to obtain trial-by-trial changes in reach angle following reward and non-  
401 reward after both placebo and levodopa administration. Next, we quantified trial by trial  
402 variability in each condition as the natural logarithm of the sample variance of  $\Delta\theta_i$ . Our  
403 dependent variable is an estimate of variance. This estimate of variance itself has variance due  
404 to sampling. For a normal distribution, the variance of a sample variance is proportional to the  
405 square of the true population variance. A log transformation is appropriate for linear modeling  
406 when the variance of the dependent measure is proportional to the square of its expectation  
407 (Montgomery, Peck, and Geoffrey Vining 2015).

408

409 We then performed 2x2 repeated measures ANOVA on  $\text{Log}(\text{var}(\Delta\theta_i))$ . The factors were drug  
410 (levels: placebo, levodopa), and reward outcome on trial  $i$  (levels: non-reward, reward.)

411

412 *Visuomotor rotation task.* To quantify trial-by-trial learning we first calculated the change in  
413 reach angle between successive trials, as in *Eq. 1*. We then performed a linear regression on  
414  $\Delta\theta_i$  with the rotation imposed on trial  $i$  as the predictor variable. The rotation was 0°,  $\pm 2^\circ$ , or  $\pm 4^\circ$ .  
415 This regression was performed on an individual participant basis, separately for placebo and  
416 levodopa conditions. We excluded trials that did not meet the duration criteria as no visual

417 feedback was provided on these trials. We took the average of the resulting slope estimates  
418 across blocks, multiplied by 1, as a metric of learning rate for each participant, as it reflects the  
419 portion of visual errors that participants corrected with a trial-by-trial adaptive process. We  
420 tested for the presence of adaptation in each condition by submitting learning rates to 1-sample  
421 t-tests against zero. We tested for an effect of levodopa vs placebo on learning rates using a  
422 paired t-test.

### 423 ***EEG preprocessing***

424  
425  
426 EEG data were resampled to 480 Hz and filtered off-line between 0.1 and 35 Hz with a second-  
427 order Butterworth filter. Continuous data were segmented into 2-s epochs time-locked to  
428 feedback stimulus onset at 0 ms (time range: -500 to +1,500 ms). Epochs flagged for containing  
429 artifacts as well as any channels with bad recordings were removed after visual inspection.  
430 Subsequently, extended infomax independent component analysis was performed on each  
431 participant's data (Delorme and Makeig 2004). Components reflecting eye movements and blink  
432 artifacts were identified by visual inspection and subtracted by projection of the remaining  
433 components back to the voltage time series.

### 434 ***EEG data analysis***

435  
436  
437 After artifact removal, we computed ERPs by trial averaging EEG time series epochs for various  
438 feedback conditions described in the sections below. ERPs were computed on an individual  
439 participant basis separately for recordings from channels FCz and Pz. We selected FCz and Pz  
440 a priori because these electrodes typically correspond to the peaks of the scalp distributions for  
441 the feedback related negativity/reward positivity and the P300 ERP components, respectively.  
442 We found this to be true in a previous experiment using a very similar paradigm (Palidis,  
443 Cashaback, and Gribble 2019). All ERPs were baseline corrected by subtracting the average  
444 voltage in the 75-ms period immediately following stimulus onset. We used a baseline period  
445 following stimulus onset because stimuli were presented immediately upon movement  
446 termination and the period before stimulus presentation was more likely to be affected by  
447 movement related artifacts. Trials in which reaches did not meet the movement duration criteria  
448 were excluded, as feedback relevant to reach adaptation was not provided on these trials.  
449 Finally, ERPs were low-pass filtered with a cutoff frequency of 30 Hz.

450  
451 We computed ERPs separately following administration of placebo and levodopa. In the reward  
452 learning task, we computed ERPs separately for feedback indicating non reward (placebo:  
453  $107.1 \pm 9.4$  trials, levodopa:  $104.1 \pm 8.3$  trials) and feedback indicating reward (placebo:  $118.5$   
454  $\pm 9.4$  trials, levodopa:  $117.9 \pm 7.9$  trials). In the visuomotor rotation task, we computed ERPs  
455 separately for veridical endpoint feedback (placebo:  $72.7 \pm 3.4$  trials, levodopa:  $73.0 \pm 3.1$   
456 trials),  $\pm 2^\circ$  rotated feedback (placebo:  $71.0 \pm 5.2$  trials, levodopa:  $72.2 \pm 3.7$  trials), and  $\pm 4^\circ$   
457 rotated feedback (placebo:  $64.7 \pm 4.7$  trials, levodopa:  $66.6 \pm 4.2$  trials). We excluded trials in  
458 which the cursor did not land within the target.

459

460 We analyzed ERPs in both the reward learning task and the visuomotor rotation task using  
461 repeated measures ANOVA on ERP voltage separately for each sample between 100-600 ms  
462 after feedback onset. We corrected significance values for multiple comparisons across time  
463 using the Benjamini-Hochberg procedure for estimating the false discovery rate, or FDR,  
464 implemented by the MATLAB *mafdr* function. For the reward learning task, we used 2x2  
465 repeated measures ANOVA with factors drug (levels: placebo, levodopa) and reinforcement  
466 outcome (levels: reward, non-reward). For the visuomotor rotation task, we used 2x3 repeated  
467 measures ANOVA with factors drug (levels: placebo, Levodopa), and rotation (levels: 0°, ±2°,  
468 ±4°). In order to better characterize effects of the rotation factor, we performed post hoc t-tests  
469 comparing ERPs elicited by rotated feedback to those elicited by unrotated feedback, separately  
470 for the ±2° and ±4° rotation conditions. We perform these tests on all time points with a  
471 significant main effect or interaction involving the rotation factor, and report time points with  $p <$   
472 0.05 as significant, uncorrected for multiple comparisons.

473

## 474 **Statistics**

475

476 Repeated measures ANOVAs were performed using the MATLAB *ranova* function. The  
477 Greenhouse–Geisser method was used to correct  $p$ -values for violations of sphericity.

478

## 479 **Experiment 2**

480

### 481 **Participants**

482

483 A total of 38 participants were included in experiment 2 (Table 2). All participants were screened  
484 for neurological and psychiatric illness, history of drug or alcohol abuse, and contraindications  
485 for levodopa. Participants provided written informed consent to experimental procedures  
486 approved by the Research Ethics Board at Western University.

487

### 488 **Procedure**

489

490 *Drug administration:* Participants were administered either levodopa or placebo in a randomized  
491 double blind design. A capsule was ingested which contained 100 mg of levodopa (L-3,4-  
492 dihydroxyphenylalanine) and 25 mg of carbidopa or an equal volume of placebo. The  
493 experimental tasks began 45 minutes after ingestion of the capsule to coincide with peak  
494 plasma levels of levodopa. We measured subjective alertness using the Bond-Lader visual  
495 analog scale (Bond and Lader 1974) as well as heart rate and blood pressure immediately prior  
496 to ingesting the capsule and again at the end of each session.

497

498 *Force field adaptation task:* Participants produced reaching movements with their right arm  
499 while holding the handle of a robotic arm (InMotion2; Interactive Motion Technologies). The  
500 position of the robot handle was sampled at 600 Hz. A semi-silvered mirror obscured vision of  
501 the arm and displayed visual information related to the task. An air sled supported each  
502 participant's right arm.

503

504 On each trial, participants reached from a central home position (blue circle 20 mm in diameter)  
505 to one of 8 circular targets (24 mm in diameter) arranged around the home position at a  
506 distance of 10 cm. The target angles were 0°, 45°, 90°, 135°, 180°, 225°, 270°, and 315°. A 5-  
507 mm pink circular cursor represented the position of the robot handle. When the cursor reached  
508 the target on each trial, the target either turned blue to indicate that the movement duration was  
509 satisfactory (375 ± 100 ms), green to indicate that the movement was too slow, or red to  
510 indicate that the movement was too fast. The subject moved the robot handle back to the home  
511 position at the end of each reach.

512

513 In null field blocks, the robot motors did not apply any external forces to the hand. In force field  
514 blocks, the robot applied forces to the hand that were perpendicular to the direction of  
515 movement and proportional to the velocity of the hand (eq. 2). The direction of the force field  
516 was either clockwise or counterclockwise, in separate blocks.

517

$$518 \begin{bmatrix} F_x \\ F_y \end{bmatrix} = b \begin{bmatrix} 0 & d \\ -d & 0 \end{bmatrix} \begin{bmatrix} v_x \\ v_y \end{bmatrix} \quad (2)$$

519

520  $x$  and  $y$  correspond to the lateral and sagittal directions.  $F_x$  and  $F_y$  describe the forces applied to  
521 the hand,  $v_x$  and  $v_y$  describe the velocity of the hand,  $b$  is the field constant, and  $d$  corresponds  
522 to the direction ( $d = 1$  for a clockwise force field (CWFF),  $-1$  for a counterclockwise force field  
523 (CCWFF) or  $0$  for a null field (NF)).

524

525 All participants completed five blocks of 96 trials. Each block consisted of 12 reaches to each of  
526 the 8 targets presented in random order. The five blocks occurred in the following order: NFa  
527 (null field), FF1a (CWFF), NFb (null field), FF1b (CWFF), FF2 (CCWFF). Trials 6, 24, 35, 50, 71,  
528 and 91 of each block were “catch trials”, during which reaches occurred in a null field. When the  
529 force field is suddenly removed in catch trials, errors occur in the opposite direction of the force  
530 field. A reduction in reach error during force field trials may reflect either adaptation to the force  
531 field, stiffening of the arm, or changes in feedback corrections. The magnitude of errors opposite  
532 the force field in catch trials is thought to better capture adaptation of feedforward control.  
533 Similar to catch trials, we expected after-effects at the beginning of NFa in the form of  
534 counterclockwise reach errors after the sudden removal of the clockwise force field in FF1a.

535

### 536 **Data analysis**

537

538 Robot handle positional data were low-pass filtered with a 40 Hz cutoff frequency and  
539 differentiated to yield instantaneous velocity and acceleration. On each trial, movement onset  
540 and end of movement were defined according to a velocity threshold set at 5% of the maximum  
541 tangential velocity of the robot endpoint. Our behavioral measure of interest was the lateral  
542 deviation of the hand at the time of peak tangential velocity. Perpendicular deviation (PD) was  
543 calculated relative to a line drawn from the position of movement onset in the direction of the  
544 target angle (either 0°, 45°, 90°, 135°, 180°, 225°, 270°, or 315°). PD was calculated for each  
545 trial as the perpendicular distance between the position of the hand at peak velocity and this



546 line, with positive PD corresponding to clockwise deviations. To analyze kinematic data from the  
547 force field and null field trials, we segmented each block into 4 bins each consisting of 24 trials.  
548 We computed the average PD across trials within each bin. We submitted the average PD for  
549 each bin to mixed ANOVAs (detailed below).

550

551 *Adaptation/Savings:* We used the data from force field trials in FF1a and FF1b blocks to test for  
552 adaptation and savings effects using a single ANOVA. Within-subject factors were bin (levels:  
553 trials 1-24, 25-48, 49-72, 73-96), and block (levels: FF1a, FF1b). Drug condition was included  
554 as a between-subjects factor (levels: placebo, levodopa). Participants encountered the same  
555 CWFF in FF1a and FF1b, separated by a null field block to produce washout of initial learning.  
556 We expected adaptation to result in decreasing PD over the course of each block, reflected in a  
557 main effect of bin. We expected savings to result in a faster reduction of PD during FF1b  
558 compared to FF1a, reflected in a bin\*block interaction effect. Potential effects of levodopa on  
559 adaptation and savings were assessed by testing for drug\*bin and drug\*bin\*block interaction  
560 effects, respectively.

561

562 We used a similar approach to analyze adaptation and savings in catch trials from FF1a and  
563 FF1b, using a separate mixed ANOVA. Within-subject factors were trial (levels:  
564 6,24,35,50,71,91) and block (levels: FF1a, FF1b). Drug condition was included as a between-  
565 subjects factor (levels: placebo, levodopa). When the force field is unexpectedly removed on  
566 catch trials, adaptation produces errors in the direction opposite the force field (negative PD).  
567 We expected adaptation to result in increasing PD opposite the force field over the course of  
568 each block, reflected in a main effect of trial. We expected savings to result in a faster increase  
569 in PD in FF1b than FF1a, reflected in a trial\*block interaction effect. Potential effects of  
570 levodopa on adaptation and savings were assessed by testing for drug\*trial and drug\*trial\*block  
571 interaction effects, respectively.

572

573 *After-Effects/Deadaptation:* We performed mixed ANOVA on PD in NFb with bin as a within  
574 subject factor and drug condition as a between-subjects factor. At the onset of NFb, the CWFF  
575 to which participants had adapted in FF1a was suddenly removed. We expected adaptation to  
576 the CWFF to produce after-effects in the form of reach errors in the direction opposite the force  
577 field (negative PD). Over the course of NFb, we expected these after-effects to decrease  
578 through deadaptation. We assessed deadaptation by testing for a main effect of bin. We  
579 expected any effects of levodopa on after-effects or deadaptation to be reflected in a drug\*bin  
580 interaction effect. We did not separately assess null field trial data in NFb as all trials occurred in  
581 a null field.

582

583 *Interference:* We performed mixed ANOVA on PD in FF2 with bin as a within subject factor and  
584 drug condition as a between-subjects factor. In FF2, participants were exposed to a CCWFF  
585 immediately after adapting to a CWFF in FF1b. We expected initially large counterclockwise  
586 reach errors (negative PD) as a consequence of the CCWFF in combination with after-effects  
587 from adaptation to the CWFF in the previous block. We assessed adaptation in the form of a  
588 reduction in these errors by testing for a main effect of bin. Typically, adaptation to a force field  
589 proceeds more slowly after previously learning an opposite force field due to anterograde

590 interference effects. We assessed effects of levodopa on interference by testing for a drug\*bin  
591 interaction effect.

592

593 We used a similar approach to analyze interference effects using the catch trial data from FF2,  
594 using a separate mixed ANOVA. Trial was used as a within subject factor (levels:  
595 6,24,35,50,71,91) and drug condition was a between-subjects factor (levels: placebo, levodopa).  
596 We expected to observe after-effects from FF1b in the form of negative PD in early catch trials,  
597 and an increase in catch trial PD values throughout the block as an indication of adaptation to  
598 the CCWFF. We assessed adaptation by testing for a main effect of trial. We assessed effects  
599 of levodopa on interference by testing for a drug\*trial interaction effect.

600

### 601 **Statistics**

602

603 Mixed ANOVAs were performed using IBM SPSS Statistics version 25. The Greenhouse–  
604 Geisser method was used to correct  $p$ -values for violations of sphericity.

605

## 606 **Results**

607

### 608 **Experiment 1**

609

610 *Control measures:* Participants' judgments at the end of the second session as to whether they  
611 received placebo or drug were correct at near chance level (47.62%). Table 1 shows the values  
612 for heart rate, blood pressure, and alertness recorded at the beginning and end of each  
613 experimental session for both the placebo and levodopa conditions. We computed the percent  
614 change in heart rate and blood pressure recorded at the beginning and end of each session.  
615 There were no reliable differences between the levodopa and placebo conditions in the percent  
616 change of heart rate ( $t(17) = 0.35$ ,  $p=0.73$ ), systolic blood pressure ( $t(17) = -1.17$ ,  $p=0.26$ ), or  
617 diastolic blood pressure ( $t(17) = -0.82$ ,  $p=0.42$ ). We did observe a significant difference between  
618 levodopa and placebo in the percent change of alertness ( $t(20) = 2.46$ ,  $p=0.023$ ). However, this  
619 effect was likely due to chance as alertness was only different between the two drug conditions  
620 at the time point pre-administration of the capsule ( $t(20) = 2.18$ ,  $p=0.042$ ), but not post-  
621 administration ( $t(20) = -0.068$ ,  $p=0.95$ )

622

### 623 **Behavioral results**

624

625 *Reward learning task.* Reach angles averaged across participants are shown in Figure 1. We  
626 analyzed reach angles averaged into bins corresponding to early, middle, and late portions of  
627 each block. We found a statistically reliable effect of intended learning direction on reach angle  
628 ( $F(1,20) = 72.58$ ,  $p = 4.35e-8$ ), indicating that participants adapted their reach angle in  
629 accordance with the reward feedback. We also observed a reliable interaction effect between  
630 direction of intended learning and bin ( $F(2,40) = 55.18$ ,  $p = 1.03e-8$ ), as behavioral adaptation  
631 accumulated over the course of each block. We did not observe reliable main effects of bin  
632 ( $F(2,40) = 2.42$ ,  $p = 0.113$ ) or drug ( $F(1,20) = 2.23$ ,  $p = 0.151$ ). Nor did we observe reliable

633 interaction effects for bin\*drug ( $F(2,40) = 1.02$ ,  $p = 0.366$ ), drug\*direction ( $F(1,20) = 2.49$ ,  $p =$   
634  $0.130$ ), or bin\*drug\*direction ( $F(2,40) = 0.14$ ,  $p = 0.798$ ).

635

636 The variance of trial-by-trial changes in reach angle following reward and non-reward outcomes  
637 is shown in Figure 2. We found a reliable main effect of reinforcement outcome on the log  
638 transformed variance of trial-by-trial changes in reach angle ( $F(1,20) = 74.84$ ,  $p = 3.41e-8$ ). This  
639 indicates an increase in trial-by-trial variance of reach angle following non-reward outcomes  
640 relative to reward. We did not find a reliable effect of drug condition ( $F(1,20) = 0.0077$ ,  $p =$   
641  $0.931$ ) or reward\*drug interaction ( $F(1,20) = 0.0478$ ,  $p = 0.829$ ).

642

643 *Visuomotor rotation task.* Mean trial-by-trial changes in reach angle after the different feedback  
644 rotations are shown in Figure 3. Learning rates were reliably greater than zero following  
645 administration of both placebo (mean: 0.313, SD: 0.133,  $t(20) = 10.77$ ,  $p = 8.93e-10$ ) and  
646 levodopa (mean: 0.294, SD: 0.102,  $t(20) = 13.18$ ,  $p = 2.54e-11$ ). Learning rates were not reliably  
647 different in the two conditions ( $t(20) = 0.703$ ,  $p=0.491$ ).

648

### 649 ***Event-related potential results***

650

#### 651 *Reward learning task.*

652

653 Electrode FCz: Event-related potentials (ERPs) elicited by reinforcement feedback at electrode  
654 FCz are shown in Figure 4a. We found reliable main effects of reinforcement outcome between  
655 197 - 600 ms after feedback onset (Figure 4c, ranges for significant time points:  $F = [5.50$   
656  $47.82]$ ,  $p = [0.047 <0.000]$ , uncorrected  $p = [ .029 <0.000]$ ). Reward feedback resulted in  
657 increased ERP voltage relative to non-reward feedback between 197-346 ms after feedback.  
658 Reward feedback resulted in decreased ERP voltage relative to non-reward feedback between  
659 383-473 ms and 531-600 ms after feedback. We did not find reliable main effects of levodopa at  
660 any time point (ranges for all timepoints between 100-600 ms:  $F = [0.00 1.92]$ , uncorrected  $p = [$   
661  $1.00 0.18]$ ). Nor did we find any reliable interaction effects between reinforcement outcome and  
662 levodopa (ranges for all timepoints between 100-600 ms:  $F = [0.00 1.75]$ , uncorrected  $p = [ 1.00$   
663  $0.20]$ ).

664

665 Electrode Pz: ERPs elicited by reinforcement feedback at electrode Pz are shown in Figure 4b.  
666 We found reliable main effects of reinforcement outcome between 220 - 600 ms after feedback  
667 onset (Figure 4d, ranges for significant time points:  $F = [6.06 75.38]$ ,  $p = [0.049 <0.000]$ ,  
668 uncorrected  $p = [ .023 <0.000]$ ). Reward feedback resulted in increased ERP amplitude relative  
669 to non-reward feedback between 220-359 ms after feedback. Reward feedback resulted in  
670 decreased ERP amplitude relative to non-reward feedback at between 468-496 ms and 533-600  
671 ms after feedback. We did not find reliable main effects of levodopa at any time point (ranges for  
672 all timepoints between 100-600 ms:  $F = [0.00 2.16]$ , uncorrected  $p = [ 0.96 0.16]$ ). Nor did we  
673 find any reliable interaction effects between reinforcement outcome and levodopa (ranges for all  
674 timepoints between 100-600 ms:  $F = [0.00 4.33]$ , uncorrected  $p = [ 0.99 0.05]$ ).

675

676 *Visuomotor rotation task.*

677

678 Electrode FCz: ERPs elicited by endpoint cursor feedback at electrode FCz are shown in Figure  
679 5a. We found reliable main effects of feedback rotation between 181 - 230 ms after feedback  
680 onset (Figure 5c, ranges for significant time points:  $F = [6.32\ 9.50]$ ,  $p = [0.041\ 0.0178]$ ,  
681 uncorrected  $p = [0.0041\ 0.0004]$ ). In all significant timepoints and for both rotation magnitudes,  
682 the ERP voltage was lower for rotated feedback compared to unperturbed feedback in the  
683 respective drug condition. Post-hoc t-tests revealed  $\pm 2^\circ$  rotated feedback caused decreased  
684 voltage relative to unrotated feedback between 181-203 ms after feedback in the levodopa  
685 condition ( $p < 0.05$  uncorrected).  $\pm 4^\circ$  rotated feedback caused decreased voltage relative to  
686 unrotated feedback between 181-230 ms after feedback in the levodopa condition and 210-230  
687 ms after feedback in the placebo condition ( $p < 0.05$  uncorrected).

688

689 We did not find reliable main effects of levodopa at any time point (ranges for all timepoints  
690 between 100-600 ms:  $F = [0.024\ 4.38]$ , uncorrected  $p = [0.878\ 0.049]$ ). Nor did we find any  
691 reliable interaction effects between reinforcement outcome and levodopa (ranges for all  
692 timepoints between 100-600 ms:  $F = [0.25\ 5.29]$ , uncorrected  $p = [0.781\ 0.0092]$ ).

693

694 Electrode Pz: ERPs elicited by endpoint cursor feedback at electrode Pz are shown in Figure  
695 5b. We found reliable interaction effects between feedback rotation and levodopa 145-213 ms,  
696 and 220-350 ms after feedback (Figure 5d, ranges for significant time points:  $F = [4.33\ 11.19]$ ,  $p$   
697  $= [0.0497\ 0.0070]$ , uncorrected  $p = [.0198\ 0.0001]$ ). The earlier cluster occurred near the onset  
698 of the P300 deflection and appear to primarily reflect a delaying of P300 onset by feedback  
699 rotation after levodopa administration but not placebo. This was supported by post hoc testing.  
700 ERP voltage was lower in  $\pm 2^\circ$  rotated feedback relative to unrotated feedback 156-161 ms and  
701 193-198 ms in the levodopa condition. ERP voltage was lower in the  $\pm 4^\circ$  rotated feedback  
702 relative to unrotated feedback between 145-169, 179-213, and 220-275 ms in the levodopa  
703 condition. In the placebo condition, voltage was larger after  $\pm 2^\circ$  rotated feedback relative to  
704 unrotated feedback 145-159 ms after feedback. Later time points with significant interaction  
705 effects between rotation and drug spanned the peak of the P300 in all conditions, and appeared  
706 to reflect an increase in P300 peak amplitude by feedback rotation after placebo but not  
707 levodopa, which was supported by post hoc tests.  $\pm 2^\circ$  rotated feedback elicited larger ERP  
708 voltage than unperturbed feedback in the placebo condition between 256-304 ms.  $\pm 4^\circ$  rotated  
709 feedback elicited larger ERP voltage than unperturbed feedback in the placebo condition  
710 between 270-334 ms.

711

712 We did not find reliable main effects of levodopa at any time point (ranges for all timepoints  
713 between 100-600 ms:  $F = [0.000\ 0.289]$ , uncorrected  $p = [0.996\ 0.597]$ ). Nor did we find any  
714 reliable main effects of feedback rotation (ranges for all timepoints between 100-600 ms:  $F =$   
715  $[0.034\ 6.37]$ , uncorrected  $p = [0.967\ 0.0040]$ ).

716

717

718 **Experiment 2**

719

720 *Control measures:* Participants' judgment as to whether they received placebo or drug was near  
721 chance level (52.63%) and only 13.16% of participants responded that they thought they had  
722 received the drug. The values for heart rate, blood pressure, and alertness are reported in Table  
723 2 for both the placebo and levodopa groups at the beginning and end of each experimental  
724 session. There were no reliable differences between the levodopa and placebo conditions in the  
725 percent change of heart rate ( $t(36) = -1.09, p=0.282$ ), systolic blood pressure ( $t(36) = 1.37,$   
726  $p=0.18$ ), diastolic blood pressure ( $t(36) = 1.37, p=0.18$ ), or alertness ( $t(36) = 0.88, p=0.39$ ).

727

### 728 ***Force field adaptation results***

729

730 In each trial, we measured the perpendicular deviation (PD) of the reach trajectory at peak  
731 tangential velocity. PD data from throughout each force field and null field block, excluding catch  
732 trials, are shown in Figure 6. PD data from catch trials are shown in Figure 7.

733

734 *Adaptation and savings:* We analyzed learning and savings effects using PD data from FF1a,  
735 when participants first encountered a CW force field, and FF1b, when participants encountered  
736 the same CW force field again after a washout block. We used mixed ANOVA with bin (trials 1-  
737 24, 25-48, 49-72, 73-96) and block (FF1a, FF1b) as within-subject factors and drug condition  
738 (placebo, levodopa) as a between-subjects factor. We observed a reliable effect of bin on PD ( $F(3,108) = 187.18, p < 0.001$ ) which reflected a decrease in PD over the course of each block,  
740 indicating adaptation. Adaptation is often facilitated when a force field is encountered a second  
741 time after washout of initial learning. This phenomenon, known as savings, would be reflected in  
742 a block\*bin interaction effect. However, we did not observe a block\*bin interaction ( $F(3,108) =$   
743  $2.006, p=0.130$ ). We also found no reliable effects of block ( $F(1,36) = 2.123, p = 0.154$ ),  
744 block\*drug ( $F(1,36) = 0.139, p = 0.712$ ), bin\*drug ( $F(3,108) = 0.702, p=0.513$ ), or block\*bin\*drug  
745 ( $F(3,108) = 1.527, p=0.219$ ), or drug ( $F(1,36) = 0.026, p = 0.872$ ).

746

747 We performed a similar analysis on the catch trial data from FF1a and FF1b, using trial  
748 (6,24,35,50,71,91) and block (FF1a, FF1b) as within-subject factors and drug condition  
749 (placebo, levodopa) as a between-subjects factor. We observed a significant main effect of trial  
750 on PD ( $F(5,175) = 20.469, p<0.001$ ), indicating that the PD opposite the direction of the force  
751 field increased in catch trials throughout each block. We also observed a marginally significant  
752 trend towards a block\*trial interaction effect ( $F(5,175) = 2.381, p = 0.055$ ), which may indicate  
753 some occurrence of savings. We observed no reliable effect of block ( $F(1,35) = 1.551, p =$   
754  $0.221$ ), block\*drug ( $F(1,35) = 0.528, p=0.472$ ), trial\*drug ( $F(5,175) = 1.111, p = 0.354$ ),  
755 block\*trial\*drug ( $F(5,175) = 0.784, p=0.536$ ), or drug ( $F(1,35) = 0.665, p = 0.420$ ).

756

757 *After-effects / Deadaptation:* We analyzed deadaptation effects using PD data from NFb, when  
758 participants reached in a null force field after adapting to a CW field in FF1a. We used mixed  
759 ANOVA with bin (trials 1-24, 25-48, 49-72, 73-96) as a within-subject factor and drug condition  
760 (placebo, levodopa) as a between-subjects factor. We found a significant effect of bin ( $F(3,108)$   
761  $= 84.388, p<0.001$ ), indicating that PD decreased over the course of the block as participants  
762 de-adapted to the previously encountered force field. We found no reliable effect of bin\*drug ( $F(3,108) = 0.503, p = 0.639$ ). We found no reliable effect of drug ( $F(1,36) = 1.681, p = 0.203$ ).

763



764

765 *Interference:* We analyzed interference effects using PD data from FF2, when participants  
766 reached in a CCW force field after adapting to a CW field in FF1b. We used mixed ANOVA with  
767 bin (trials 1-24, 25-48, 49-72, 73-96) as a within-subject factor and drug condition (placebo,  
768 levodopa) as a between-subjects factor. We found a significant effect of bin ( $F(3,108) =$   
769  $217.532, p < 0.001$ ). We found no reliable effect of bin\*drug ( $F(3,108) = 0.876, p = 0.445$ ). We  
770 found no reliable effect of drug ( $F(1,36) = 0.603, p = 0.443$ ).

771

772 We analyzed the catch trial data from FF2 using trial (6,24,35,50,71,91) as a within-subject  
773 factor and drug condition (placebo, levodopa) as a between-subjects factor. We found a reliable  
774 effect of trial ( $F(5,180) = 38.111, p < 0.001$ ). We did not find reliable effects of trial\*drug  
775 ( $F(5,180) = 0.810, p = 0.517$ ), or drug ( $F(1,36) = 0.690, p = 0.412$ ).

776

## 777 **Discussion**

778

779 We tested for effects of levodopa, a dopamine precursor, in three different motor adaptation  
780 tasks across two experiments. In the first experiment we recorded EEG during a reward-based  
781 motor adaptation task and a sensory error-based visuomotor rotation (VMR) adaptation task. In  
782 the second experiment, we used a force field adaptation paradigm to test for effects of levodopa  
783 on initial adaptation, savings, and anterograde interference. We hypothesized that levodopa  
784 would selectively impair neural and behavioral responses to reinforcement feedback in the  
785 reward-based learning task as well as savings and interference. However, the only reliable  
786 influence of levodopa was in modulating the effect of visuomotor rotation on the P300 event-  
787 related potential component.

788

789 *Visuomotor rotation task:* During the VMR task included in experiment one, a cursor appeared  
790 at the endpoint of each reach to represent the position of the hand. In randomly intermixed  
791 trials, the cursor indicated a reach angle which was rotated relative to the true reach angle by  
792 either  $0^\circ$ ,  $\pm 2^\circ$ , or  $\pm 4^\circ$ . Adaptation was evident in trial-by-trial changes in reach angle opposite the  
793 direction of the rotations that scaled linearly with rotation magnitude. We observed no effect of  
794 levodopa on adaptation. This was expected, as trial-by-trial error correction induced by relatively  
795 small visuomotor rotations is thought to be driven primarily by sensory error-based learning  
796 mechanisms as opposed to dopaminergic reinforcement learning circuits (Tanaka, Sejnowski,  
797 and Krakauer 2009; Diedrichsen et al. 2005; Wong et al. 2019; Taylor, Klemfuss, and Ivry 2010;  
798 Ito 2000; Krakauer et al. 2004).

799

800 We previously found that visuomotor rotation caused small but reliable increases in the peak  
801 amplitude of the P300 ERP component, a positive ERP deflection which peaked at electrode Pz  
802 between 342-350 ms following feedback presentation (Palidis, Cashaback, and Gribble 2019).  
803 This is consistent with theoretical interpretations of the P300 as a process of updating neural  
804 representations of the stimulus context in response to prediction error (Feldman and Friston  
805 2010; Mars et al. 2008; Bennett, Murawski, and Bode 2015; Polich 2007; Donchin and Coles  
806 1988; Krigolson and Holroyd 2007). We concluded that the neural underpinnings of the P300  
807 may play a role in processing sensory error feedback, which contributes to adaptation. In the

808 present study, we observed interaction effects between feedback rotation and drug condition on  
809 ERPs recorded from electrode Pz beginning near the onset of the P300 and extending beyond  
810 its peak. Effects around the P300 peak were characterized by increased P300 amplitude in  
811 response to visuomotor rotations in the placebo condition but not in the levodopa condition. This  
812 result replicates previous findings that visuomotor rotations increase the amplitude of P300  
813 responses to feedback, and additionally suggests that this effect is dependent on dopaminergic  
814 signaling (Palidis, Cashaback, and Gribble 2019; Aziz et al. 2020; MacLean et al. 2015).  
815 However, disruption of P300 amplitude modulation by dopaminergic perturbation did not  
816 correspond to any behavioral changes, indicating that the modulation of P300 amplitude by  
817 sensory error is not essential for adaptation. Nevertheless, we do not rule out a role of the P300  
818 in processing sensory error, as a robust P300 response was still elicited by cursor feedback  
819 after levodopa administration that may have been sufficient to produce adaptation. Interaction  
820 effects of rotation and levodopa near the onset of the P300 were characterized by increased  
821 latency of P300 onset by feedback rotation in the levodopa condition relative to placebo. The  
822 effects of levodopa on P300 amplitude and latency are consistent with previous work indicating  
823 a relationship between dopamine function and the P300 response, however the neural  
824 mechanisms and functional significance of the P300 in relation to motor adaptation remain  
825 unclear (Stanzione et al. 1991; Noble et al. 1994; Sohn et al. 1998; Mulert et al. 2006; Pogarell  
826 et al. 2011; Stanzione et al. 1990; Hansenne et al. 1995; Takeshita and Ogura 1994; Chu et al.  
827 2018). Variants of the P300 are elicited by many types of task-relevant stimuli, and have been  
828 localized to diffuse cortical areas including parietal, frontal, and motor regions, which have been  
829 implicated in processing prediction error (Bledowski et al. 2004; Polich 2007; Li, Wang, and Hu  
830 2009; Soltani and Knight 2000; Ragazzoni et al. 2019; Sabeti et al. 2016; Calhoun et al. 2006;  
831 Mantini et al. 2009; Johnson et al. 2019).

832  
833 We also observed a main effect of feedback rotation on ERP voltage between 181-230 ms after  
834 feedback onset at electrode FCz, a medial frontal site. This effect was characterized by lower  
835 ERP voltage in response to rotated feedback compared to non-rotated feedback, and appears  
836 to reflect a modulation of an N200 ERP component, a negative deflection which is typically  
837 maximal at electrode FCz and corresponds to activity in the theta frequency band linked to  
838 cognitive control over actions, conflict or error monitoring, and mismatch (Holroyd, Pakzad-  
839 Vaezi, and Krigolson 2008; Folstein and Van Petten 2008; Cavanagh and Frank 2014; Harper,  
840 Malone, and Bernat 2014). Previous studies have demonstrated modulations of medial frontal  
841 theta band activity that is not attributable to reward prediction error (Jonker et al., n.d.;  
842 Torrecillos et al. 2014; Savoie et al. 2018). This is consistent with our finding that visuomotor  
843 rotation produced effects at medial frontal scalp despite our attempts to control for reward  
844 prediction error and task success. Meta-analysis has shown that medial frontal ERPs are most  
845 sensitive to reward prediction error at latencies between 240-340 ms, while earlier effects of  
846 task feedback are more attributable to salience (Sambrook and Goslin 2015). This corroborates  
847 our result that sensory error feedback produced medial frontal effects with latencies only up to  
848 230 ms while reinforcement feedback modulated the FRN/RP up to 350 ms.

849  
850 *Reward learning task:* Participants adapted reliably to manipulations of binary reinforcement  
851 feedback intended to produce either progressively clockwise or counterclockwise reach angles.

852 Dopaminergic signaling of reward prediction error has proven to be a highly general mechanism  
853 for learning through reinforcement feedback, and computational reinforcement learning models  
854 using reward prediction error have been used to successfully account for reward-based motor  
855 adaptation (Izawa and Shadmehr 2011; Dhawale et al. 2019). Thus, we hypothesized that  
856 dopaminergic perturbation through levodopa would impair reward-based motor adaptation in  
857 healthy participants, as it has been shown to do in various other reinforcement based learning  
858 tasks. However, we found no effects of levodopa on adaptation. One possibility is that levodopa  
859 at the dose used in the current study is simply not a powerful enough disruption of dopaminergic  
860 function to impair learning in the task we used. Another possibility is that learning in the current  
861 task relies on different neural mechanisms than those shown to be impaired by levodopa in  
862 other tasks. (Quattrocchi et al. 2018) found no effect of levodopa or a dopamine antagonist  
863 haloperidol on modulation of sensory error-based learning by additional reinforcement feedback.  
864 (Holland et al. 2019) found no association between dopamine-related gene polymorphisms on  
865 adaptation through binary reinforcement feedback in a task similar to that used in the current  
866 study. Together, these findings suggest that reward-based motor adaptation may not rely on  
867 dopamine function.

868  
869 The “dopamine overdose” hypothesis states that levodopa impairs learning by disrupting  
870 learning processes in the ventral striatum. The ventral striatum may specifically mediate  
871 stimulus-based reinforcement learning, while action-based reinforcement learning in the current  
872 study may be subserved by the dorsal striatum (Rothenhoefer et al. 2017). Furthermore,  
873 levodopa may specifically impair learning from unfavorable outcomes as opposed to rewarding  
874 outcomes (Roshan Cools et al. 2007; Roshan Cools, Altamirano, and D’Esposito 2006; Frank,  
875 Seeberger, and O’reilly 2004; Vo, Seergobin, and MacDonald 2018). Non-reward outcomes in  
876 the current task may not contribute significantly to learning as they do not instruct the correct  
877 response, unlike in binary response tasks.

878  
879 Another important distinction is between model-free and model-based reinforcement learning  
880 processes (Babayan, Uchida, and Gershman 2018; Shahar et al. 2019; Daw et al. 2011; Dolan  
881 and Dayan 2013; Russek et al. 2017; Deserno et al. 2015; Doll et al. 2016; Gläscher et al. 2010;  
882 Sharpe et al. 2017; Gardner Matthew P. H., Schoenbaum Geoffrey, and Gershman Samuel J.  
883 2018; Sambrook et al. 2018). Model-free reinforcement learning is characterized by  
884 reinforcement of simple stimulus-response associations that facilitate habitual, reflexive  
885 responding. Model-based learning allows for flexible planning according to a mental  
886 representation of the task, and can be limited by working memory processes. Levodopa has  
887 been shown to impair reward-based learning in healthy controls and Parkinson’s disease  
888 patients, but also to improve some cognitive functions in patients such as working memory,  
889 cognitive flexibility, and attention, which are related to model-based learning (Torta et al. 2009;  
890 Cooper et al. 1992; Costa et al. 2003; Lange et al. 1992; Lewis et al. 2005; Marini et al. 2003;  
891 Beato et al. 2008; Moustafa, Sherman, and Frank 2008; Kulisevsky 2000; R. Cools et al. 2001;  
892 Roshan Cools et al. 2003). It is possible that “dopamine overdose” by levodopa selectively  
893 impairs model-free learning. This is partly supported by one study which specifically probed  
894 model-based learning and found that levodopa improved performance in individuals with  
895 Parkinson’s disease (Sharp et al. 2016). It may be that reward-based motor adaptation in the

896 current study relies on model-based learning, which is not vulnerable to “dopamine overdose” in  
897 healthy populations. Reward-based motor adaptation tasks similar to that in the current study  
898 have been shown to primarily involve strategic aiming which can be influenced by explicit  
899 instructions and cognitive load, suggesting a primary role of model-based learning (Codol,  
900 Holland, and Galea 2018; Holland, Codol, and Galea 2018).

901  
902 We also analyzed the variability of trial-by-trial changes in reach angle as a function of reward  
903 outcomes. An increase in variability following non-reward may reflect exploration in search of  
904 more valuable actions (Cashaback et al. 2017; Dhawale et al. 2019). Reward related modulation  
905 of motor variability has been shown to be impaired in medicated Parkinson’s disease in a very  
906 similar task (Pekny, Izawa, and Shadmehr 2015). We hypothesized that this effect may be due  
907 to off-target effects of dopaminergic medication, and that we would observe similar impairments  
908 in healthy participants after levodopa administration. However, we observed no effect of  
909 levodopa on reward-related modulation of motor variability. Reward-based modulation of  
910 exploratory variance may therefore not depend on the ventral striatum, which is relatively  
911 spared in early stage Parkinson’s disease and therefore vulnerable to “dopamine overdose” in  
912 patients and healthy controls alike. Instead, it may depend on the dorsal striatum, which is more  
913 closely related to movement planning and is primarily impacted by early stage Parkinson’s  
914 Disease.

915  
916 Reinforcement feedback elicited a very reliable FRN/RP ERP component, which was  
917 characterized by a relative positivity for reward outcomes compared to non-reward outcomes  
918 that was statistically significant at electrode FCz between 197-346 ms after feedback. Meta  
919 analyses have shown that the FRN/RP at the same scalp location and similar time ranges  
920 encodes a quantitative reward prediction error across multiple different tasks (Sambrook and  
921 Goslin 2015; Walsh and Anderson 2012). Reports have linked the FRN/RP signal to behavioral  
922 adjustments in response to feedback (Palidis, Cashaback, and Gribble 2019; Arbel, Goforth,  
923 and Donchin 2013; Holroyd and Krigolson 2007; van der Helden, Boksem, and Blom 2010;  
924 Frank, Woroch, and Curran 2005). These findings support a prominent theory purporting that  
925 the FRN/RP is a reflection of reinforcement learning processes in the anterior cingulate cortex  
926 driven by phasic dopamine reward prediction error signals (Holroyd and Coles 2002; Walsh and  
927 Anderson 2012). We hypothesized that levodopa would reduce the magnitude of the FRN due  
928 to increased tonic dopamine release resulting in a reduction of dynamic range for phasic  
929 changes in dopamine release. However, we observed no effects of levodopa on the FRN/RP in  
930 response to reinforcement feedback. Previous studies have supported a link between dopamine  
931 and the FRN/RP, although results have been mixed. FRN/RP amplitude has been shown to be  
932 impaired in Parkinson’s disease patients with apathy but normal in nonapathetic patients  
933 (Martínez-Horta et al. 2014). (Brown, Pirio Richardso, and Cavanagh 2019) found that the  
934 reward positivity was impaired in Parkinson’s disease patients relative to controls ON levodopa  
935 but not OFF levodopa, which is consistent with the dopamine overdose hypothesis. However,  
936 there was no significant effect of medication condition within patients. In healthy participants, the  
937 dopamine antagonist haloperidol has shown mixed results in reducing the amplitude of the  
938 reward positivity (Schutte et al. 2020; Forster et al. 2017). (Mueller et al. 2014), found that the  
939 D2 receptor dopamine antagonist sulpiride had opposite effects on FRN/RP amplitude

940 depending on a genotype variant which regulates prefrontal dopamine levels. This result may  
941 depend on a u-shaped relationship between dopamine release in the prefrontal cortex and  
942 FRN/RP amplitude mediated by the balance between D1 and D2 receptor activation. Because  
943 the effect of dopamine manipulation on the FRN/RP seems to depend on genetic differences in  
944 baseline dopamine release, one possibility is that levodopa in the current study had inconsistent  
945 effects on different subgroups of participants which cancelled each other in the group average.

946  
947 *Force field adaptation task:* Participants reliably adapted to the clockwise force field imposed in  
948 blocks FF1a and FF1b. This was evidenced by decreasing error in response to the force field  
949 perturbations over the course of each block and increasing error opposite the direction of the  
950 force field in catch trials. We observed no reliable effects of savings, whereby adaptation is  
951 typically facilitated upon encountering a force field a second time after washout of initial  
952 adaptation. Only a trend was observed towards an interaction effect between trial bin and block  
953 (FF1a, FF1b) on the PD during catch trials ( $p=0.056$ ), indicating that the time course of  
954 adaptation may have been affected by savings. We did not observe any reliable effects of  
955 levodopa on adaptation or savings. In the final experimental block (FF2), participants adapted to  
956 a counterclockwise force field immediately after adapting to a clockwise field in FF1b. This  
957 allowed us to test for effects of levodopa on anterograde interference, whereby adaptation to a  
958 new force field is impaired by previous adaptation to an opposite perturbation. We observed no  
959 effects of levodopa on learning in FF2, suggesting that levodopa did not influence anterograde  
960 interference.

961  
962 Force field adaptation is thought to rely primarily on sensory error-based learning mechanisms  
963 involving the cerebellum. Savings and interference effects have been accounted for by  
964 additional model-free learning processes including operant reinforcement of adapted motor  
965 commands upon repetition of successful reaches (Huang et al. 2011). These distinctions are  
966 supported by findings that cerebellar degeneration impairs force field adaptation while  
967 Parkinson's disease patients are spared in initial adaptation but display deficient savings and  
968 interference (Taylor, Klemfuss, and Ivry 2010; Maschke et al. 2004; Leow et al. 2013; Leow,  
969 Loftus, and Hammond 2012; Bédard and Sanes 2011, 2014). Thus, we hypothesized that  
970 dopaminergic perturbation by levodopa would impair savings and interference while leaving  
971 initial adaptation intact. We found no effect of levodopa on savings or interference. However, the  
972 experimental protocol may have been insufficient to produce savings or interference even in the  
973 control group, as we observed limited evidence of savings overall. Savings and interference  
974 have been shown to depend on sufficient repetition of the adapted movements to produce  
975 reinforcement of the adapted movements (Huang et al. 2011; Leow et al. 2016). Because the  
976 current study involved reaches to 8 different targets, repetition and each individual target was  
977 limited relative to single target experiments.

978  
979 *Conclusions:* As we expected, sensory error-based motor adaptation induced by visuomotor  
980 rotations and force field perturbations was not vulnerable to disruption of dopamine signaling by  
981 levodopa. This supports the notion that sensory error-based learning is driven by circuits  
982 involving cerebellar and sensorimotor cortex distinct from dopaminergic reinforcement learning  
983 mechanisms. Contrary to our hypotheses, we also failed to detect any effects of levodopa on



984 reward-based motor learning or the FRN/RP ERP component, which have both been theorized  
985 to depend on dopaminergic signaling of reward prediction error. The dopamine overdose  
986 hypothesis suggests that levodopa impairs stimulus-response reinforcement learning processes  
987 in the ventral striatum. Reward-based motor adaptation may instead depend on distinct  
988 reinforcement learning circuits which are not disrupted by levodopa such as cortical reward  
989 learning mechanisms or dopaminergic projections to the dorsal striatum.

990 **Tables**

991

| Measure   | Placebo                                           | Levodopa                                          |
|-----------|---------------------------------------------------|---------------------------------------------------|
| HR        | Pre: 76.24 (SD: 11.29)<br>Post: 69.60 (SD: 7.27)  | Pre: 77.55 (SD: 8.41)<br>Post: 71.53 (SD: 6.92)   |
| Sys       | Pre: 104.43 (SD: 9.01)<br>Post: 104.20 (SD: 6.47) | Pre: 103.95 (SD: 8.34)<br>Post: 102.79 (SD: 8.70) |
| Dia       | Pre: 72.14 (SD: 5.14)<br>Post: 73.20 (SD: 4.55)   | Pre: 70.55 (SD: 6.81)<br>Post: 69.74 (SD: 6.04)   |
| Alertness | Pre: 64.58 (SD: 8.38)<br>Post: 47.99 (SD: 15.43)  | Pre: 58.20 (SD: 11.79)<br>Post: 48.16 (SD: 15.33) |

992

993 *Table 1: Control measurements from experiment 1. HR, heart rate (bpm). Sys, systolic blood*  
 994 *pressure (mm Hg). Dia, diastolic blood pressure (mm Hg). Alertness, Bond-Lader visual analog*  
 995 *scale alertness measure.*

996

| Measure         | Placebo                                         | Levodopa                                         |
|-----------------|-------------------------------------------------|--------------------------------------------------|
| <i>n</i>        | 19                                              | 19                                               |
| <i>n</i> female | 9                                               | 10                                               |
| Age             | 21.2 (SD: 2.5)                                  | 22.2 (SD: 3.4 years)                             |
| HR              | Pre: 75.1 (SD: 9.5)<br>Post: 66.2 (SD: 10.2)    | Pre: 71.6842 (SD: 12.8)<br>Post: 65.7 (SD: 11.3) |
| Sys             | Pre: 109.2 (SD: 15.4)<br>Post: 104.8 (SD: 14.5) | Pre: 108.4 (SD: 11.4)<br>Post: 99.7 (SD: 10.1)   |
| Dia             | Pre: 72.0 (SD: 10.2)<br>Post: 70.1 (SD: 10.2)   | Pre: 73.2 (SD: 15.5)<br>Post: 67.0 (SD: 8.2)     |
| Alertness       | Pre: 31.3 (SD: 15.3)<br>Post: 39.4 (SD: 17.0)   | Pre: 27.1 (SD: 11.0)<br>Post: 43.4 (SD: 12.7)    |

997

998 *Table 2: Control measurements from Experiment 2. HR, heart rate (bpm). Sys, systolic blood*  
 999 *pressure (mm Hg). Dia, diastolic blood pressure (mm Hg). Alertness, Bond-Lader visual analog*  
 1000 *scale alertness measure.*

1001 **Figures**

1002

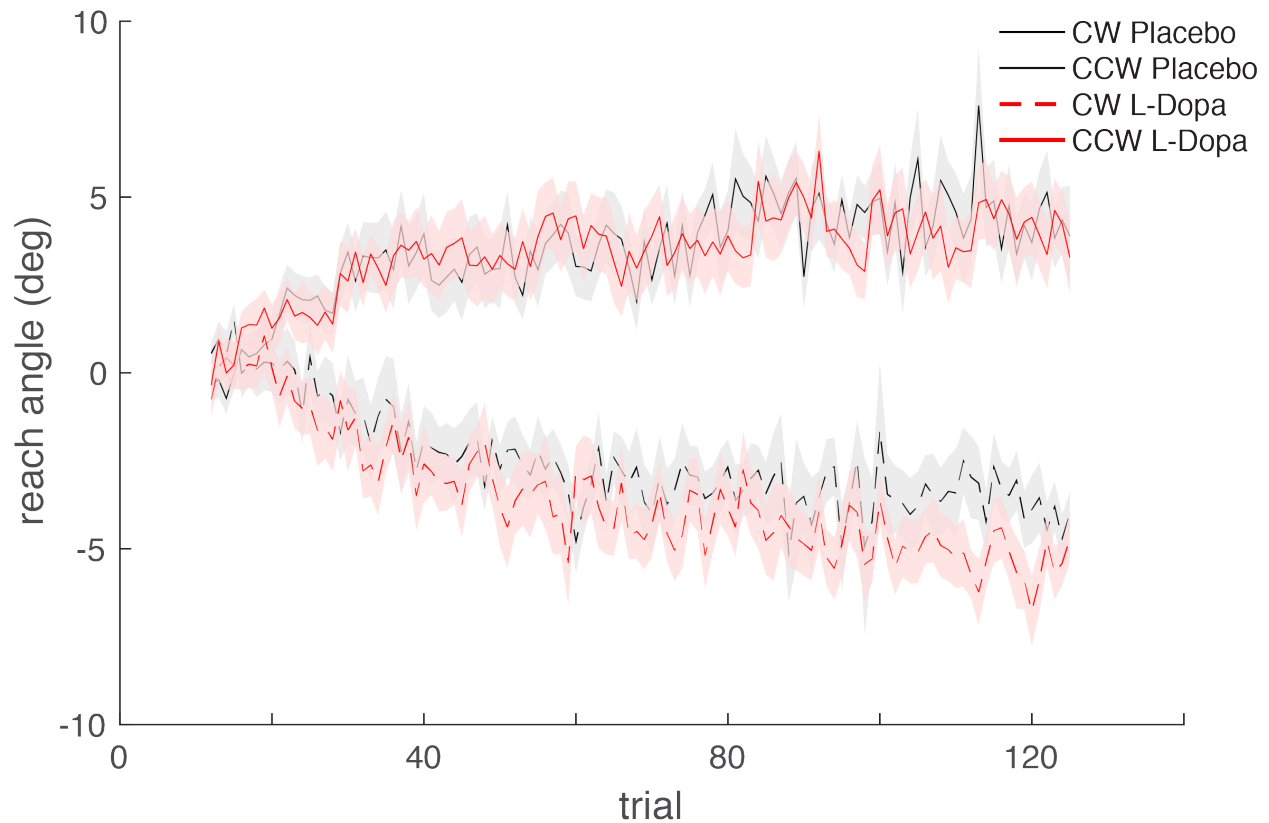

1003

1004

1005 **Figure 1.** Reward based motor adaptation (n=21). Group average reach angles in the reward  
1006 learning conditions are plotted (Shaded region:  $\pm$  SEM). After both placebo and levodopa  
1007 administration, participants completed a block in each direction of intended learning condition  
1008 [clockwise (CW) and counterclockwise (CCW)]. Trials 1-11 were baseline trials without  
1009 reinforcement feedback, and are not shown.

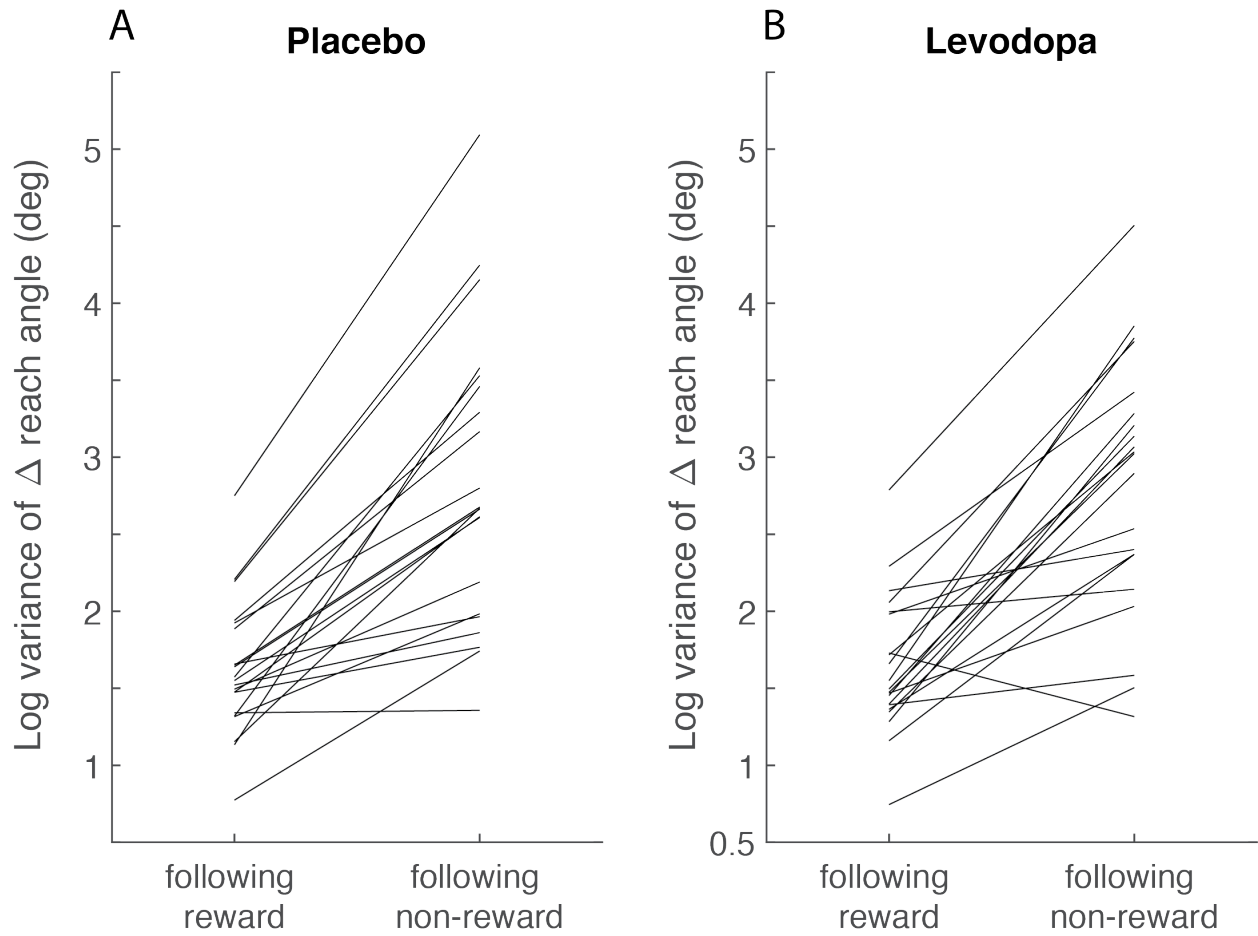

1010

1011

1012

1013

1014

**Figure 2.** Reward induced modulation of trial-by-trial variability of reach angle (n=21). The log transformed variance of trial-by-trial changes in reach angle (deg) following reward and non-reward are plotted for each participant following administration of levodopa (**A**) and placebo (**B**).

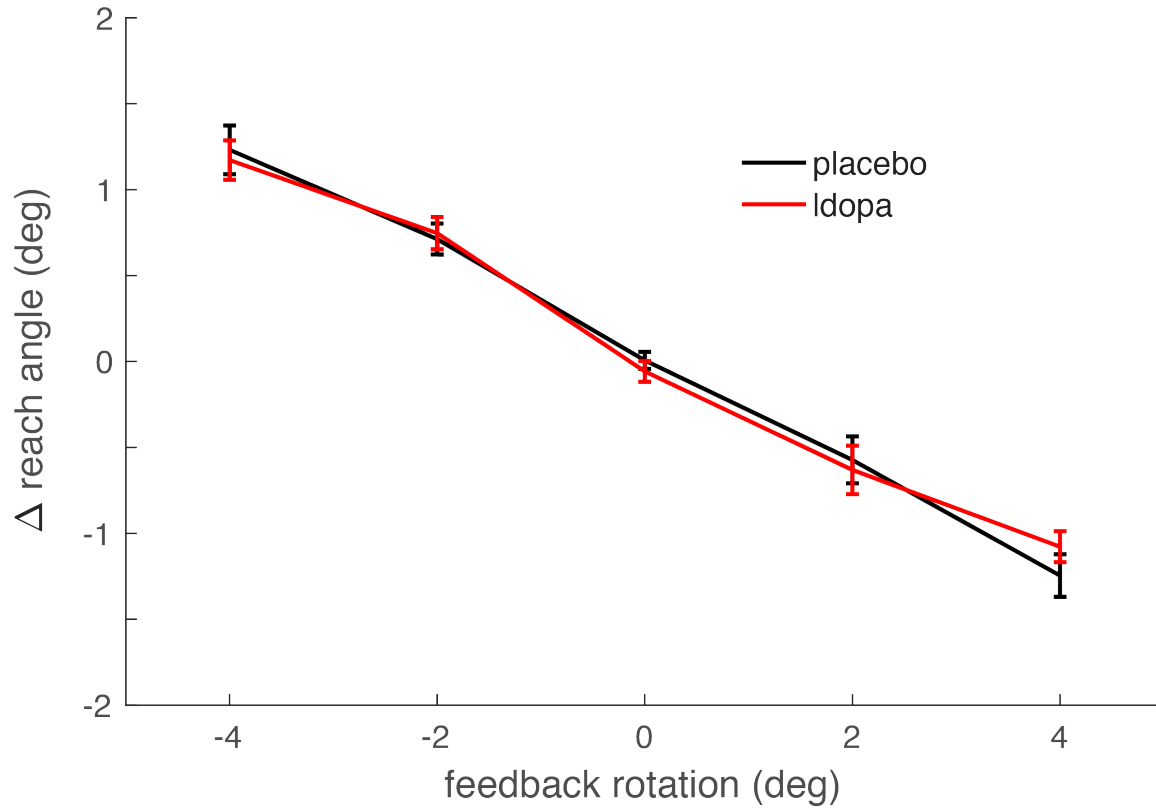

1015

1016

1017 **Figure 3.** Sensory error-based motor adaptation (n=21). The average change in reach angle  
1018 between subsequent pairs of trials is plotted for each size and direction of rotation imposed on  
1019 the preceding trial. The average change in reach angle is in all cases opposite to the rotation,  
1020 indicating that participants adapted their reaches to counteract the perturbations.



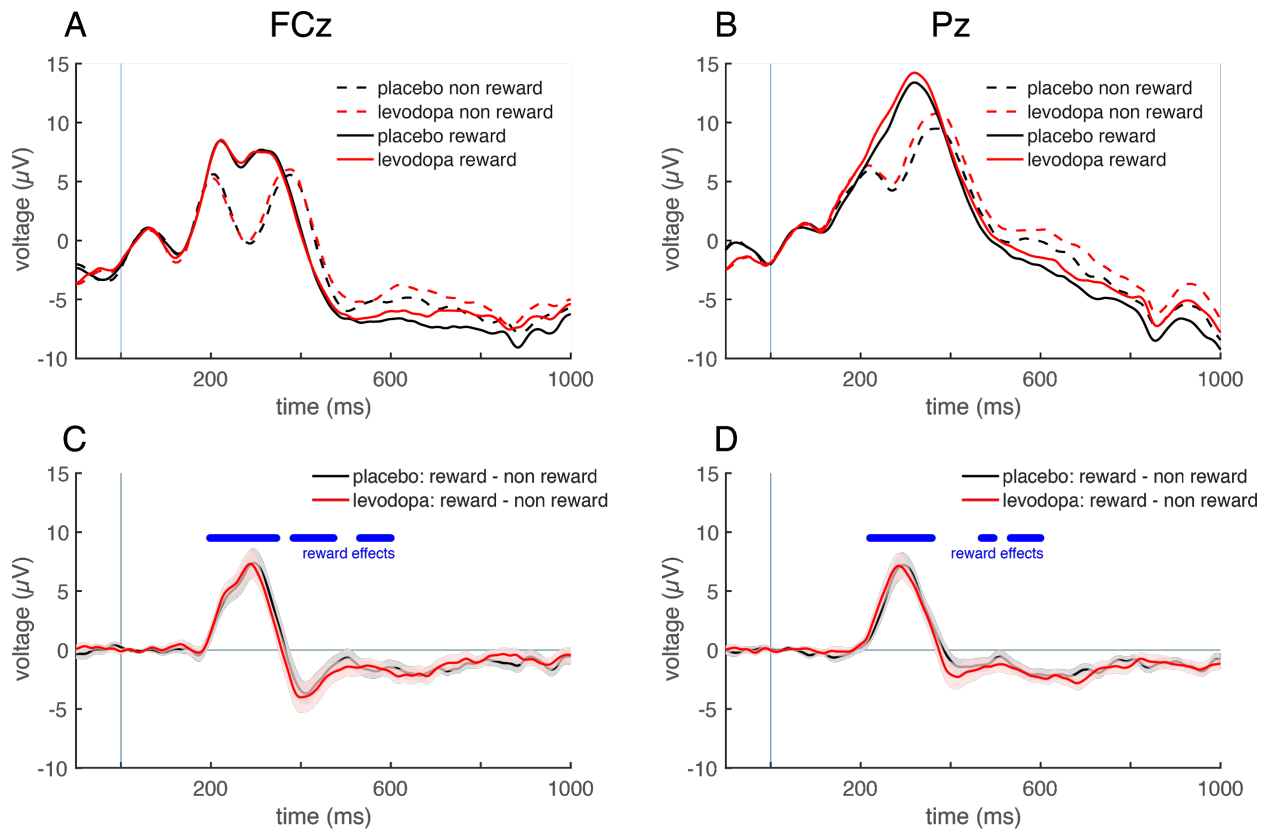

1021

1022

1023 **Figure 4.** Event-related potentials elicited by reinforcement feedback (n=21). **A,B,** Trial  
1024 averaged ERPs recorded from electrode FCz and Pz. ERPs are aligned to reinforcement  
1025 feedback presentation (0 ms: vertical blue line). Trials were selected by reinforcement outcome  
1026 (reward or non-reward) and drug condition (levodopa or placebo) for averaging. **C,D,** Mean  
1027 difference waves computed as reward ERP - non reward ERP, separately for the levodopa and  
1028 placebo conditions (Shaded region:  $\pm$  SEM). Blue markers indicate time points between 100-  
1029 600 ms with significant main effect of reward outcome ( $p < 0.05$ , FDR corrected).

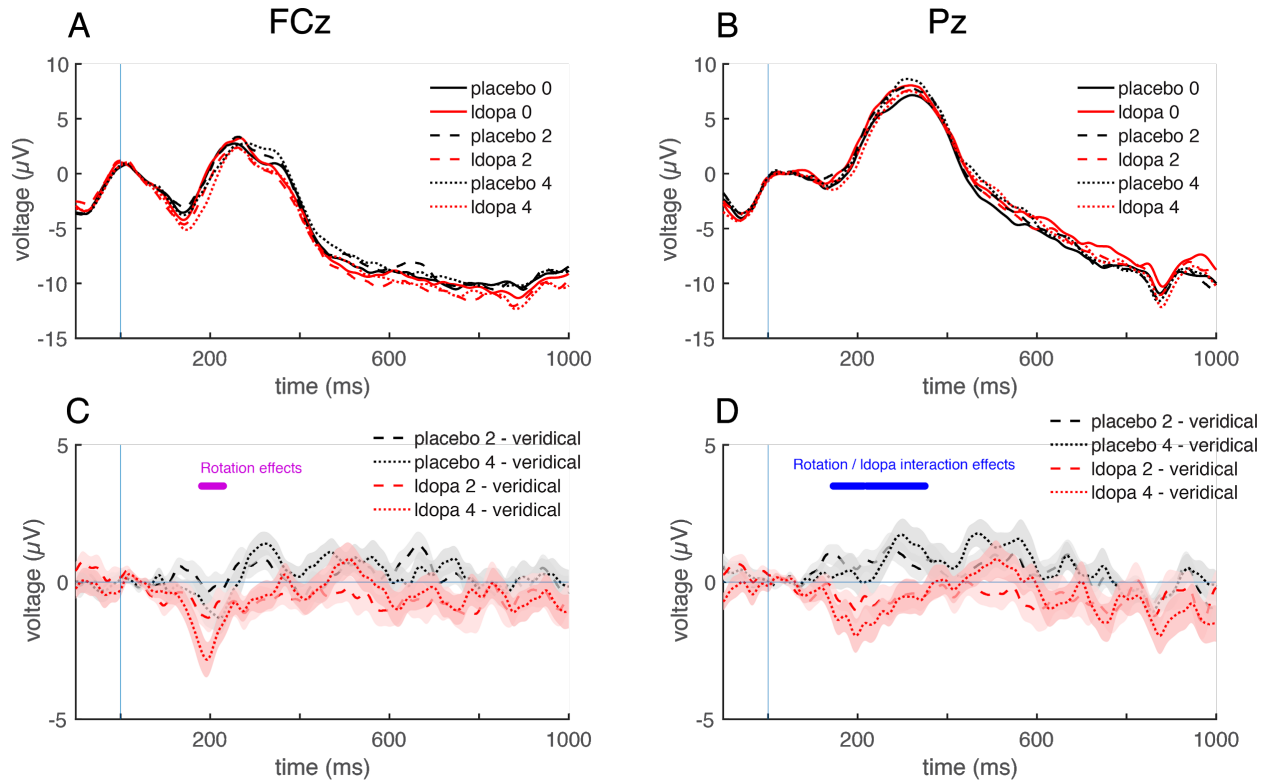

1030

1031

1032 **Figure 5.** Event-related potentials elicited by endpoint cursor feedback (n=21). **A,B,** Trial  
1033 averaged ERPs recorded from electrode FCz and Pz. ERPs are aligned to endpoint cursor  
1034 feedback presentation (0 ms: vertical blue line). Trials were selected for feedback rotation ( $0^\circ$ ,  
1035  $\pm 2^\circ$ , or  $\pm 4^\circ$ ) and drug condition (levodopa or placebo) for averaging. **C,D,** Mean difference  
1036 waves computed as rotated feedback ERP - non rotated feedback ERP, separately for each  
1037 rotation size and drug condition (Shaded region:  $\pm$  SEM). Purple markers indicate time points  
1038 between 100-600 ms with significant main effect of feedback rotation, while blue markers  
1039 indicate significant rotation by drug interactions ( $p < 0.05$ , FDR corrected).

1040

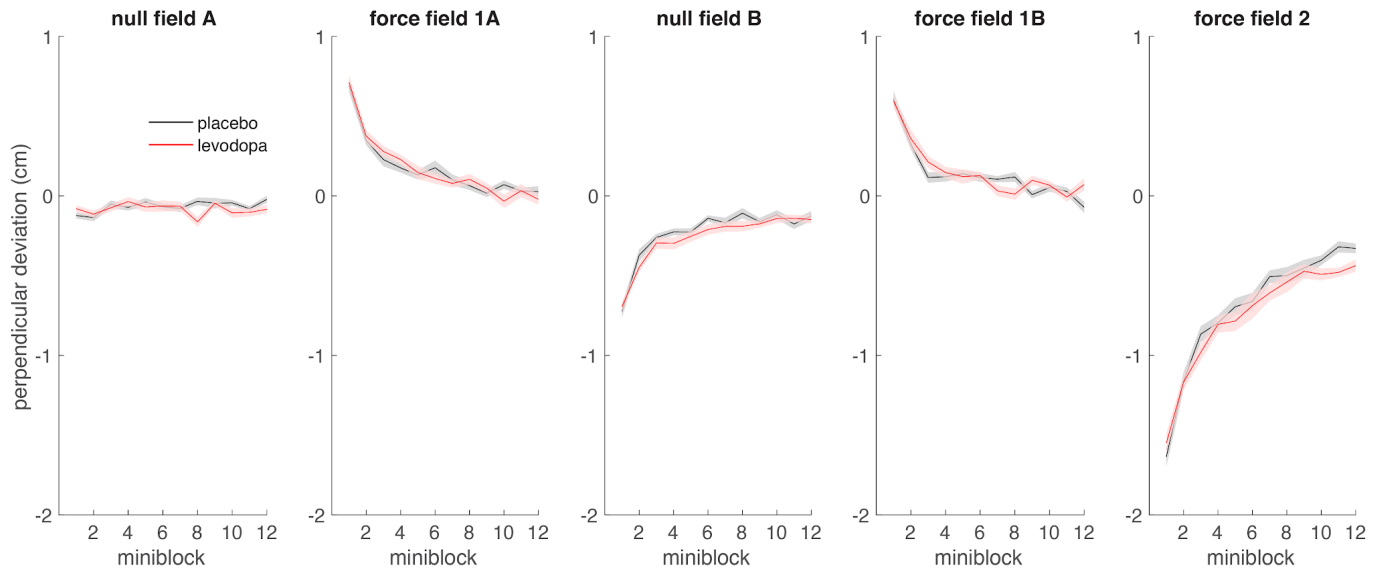

1041

1042

1043

1044

1045

1046

1047

1048

1049

1050

1051

1052

**Figure 6.** Adaptation effects during force field and null field reaches. Average perpendicular deviation of the hand trajectory within miniblocks consisting of 8 trials each is shown in cm (Shaded region:  $\pm$  SEM). The placebo condition is shown in black ( $n=19$ ), and the levodopa condition is shown in red ( $n=19$ ). Perpendicular deviation was measured on each trial at peak tangential velocity. Trials 6, 24, 35, 50, 71, and 91 of each block were catch trials, and were excluded from the corresponding miniblocks. In *null field A* and *null field B*, the robot did not apply external forces to the hand during reaches. In *force field 1A* and *force field 1B*, participants made reaches in a clockwise force field. In *force field 2* participants made reaches in a counterclockwise force field.

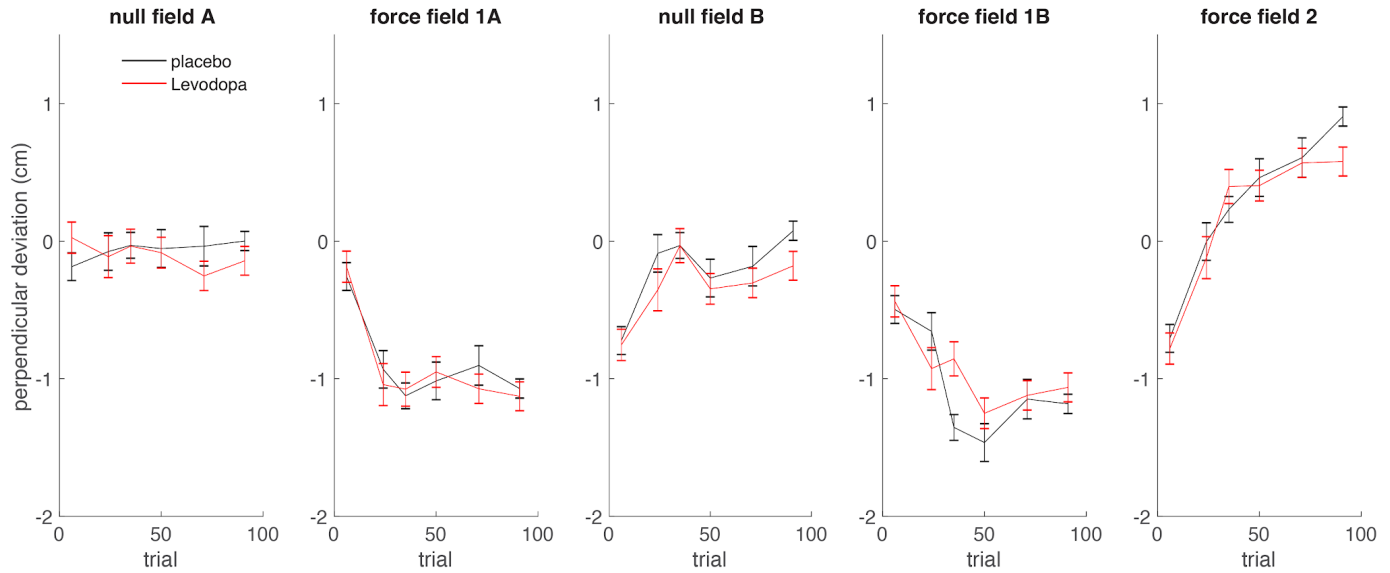

1053

1054

1055 **Figure 7.** Adaptation effects during catch trials. Perpendicular deviation of the hand trajectory,  
1056 measured at peak tangential velocity, is shown in cm (Error bars:  $\pm$  SEM). The placebo  
1057 condition is shown in black (n=19), and the levodopa condition is shown in red (n=19). Catch  
1058 trials occurred on trials 6, 24, 35, 50, 71, and 91 of each block. In *null field A* and *null field B*,  
1059 the robot did not apply external forces to the hand during reaches. In *force field 1A* and *force*  
1060 *field 1B*, participants made reaches in a clockwise force field. In *force field 2* participants made  
1061 reaches in a counterclockwise force field.

1062 **References**

- 1063 Adams, Rick A., Stewart Shipp, and Karl J. Friston. 2013. "Predictions Not Commands: Active  
1064 Inference in the Motor System." *Brain Structure & Function* 218 (3): 611–43.
- 1065 Arbel, Yael, Kristen Goforth, and Emanuel Donchin. 2013. "The Good, the Bad, or the Useful?  
1066 The Examination of the Relationship between the Feedback-Related Negativity (FRN) and  
1067 Long-Term Learning Outcomes." *Journal of Cognitive Neuroscience* 25 (8): 1249–60.
- 1068 Aziz, Jasmine R., Stephane J. MacLean, Olave E. Krigolson, and Gail A. Eskes. 2020. "Visual  
1069 Feedback Modulates Aftereffects and Electrophysiological Markers of Prism Adaptation."  
1070 *Frontiers in Human Neuroscience* 14 (April): 138.
- 1071 Babayan, Benedicte M., Naoshige Uchida, and Samuel J. Gershman. 2018. "Belief State  
1072 Representation in the Dopamine System." *Nature Communications* 9 (1): 1891.
- 1073 Bayer, Hannah M., and Paul W. Glimcher. 2005. "Midbrain Dopamine Neurons Encode a  
1074 Quantitative Reward Prediction Error Signal." *Neuron* 47 (1): 129–41.
- 1075 Beato, Rogério, Richard Levy, Bernard Pillon, Christine Vidal, Sophie Tezenas du Montcel,  
1076 Bernard Deweer, Anne-Marie Bonnet, Jean-Luc Houeto, Bruno Dubois, and Francisco  
1077 Cardoso. 2008. "Working Memory in Parkinson's Disease Patients: Clinical Features and  
1078 Response to Levodopa." *Arquivos de Neuro-Psiquiatria* 66 (2A): 147–51.
- 1079 Becker, Michael P. I., Alexander M. Nitsch, Wolfgang H. R. Miltner, and Thomas Straube. 2014.  
1080 "A Single-Trial Estimation of the Feedback-Related Negativity and Its Relation to BOLD  
1081 Responses in a Time-Estimation Task." *The Journal of Neuroscience: The Official Journal  
1082 of the Society for Neuroscience* 34 (8): 3005–12.
- 1083 Bédard, Patrick, and Jerome N. Sanes. 2011. "Basal Ganglia-Dependent Processes in  
1084 Recalling Learned Visual-Motor Adaptations." *Experimental Brain Research.  
1085 Experimentelle Hirnforschung. Experimentation Cerebrale* 209 (3): 385–93.
- 1086 Bédard, Patrick, and Jerome N. Sanes. 2014. "Brain Representations for Acquiring and  
1087 Recalling Visual-Motor Adaptations." *NeuroImage* 101 (November): 225–35.
- 1088 Bennett, Daniel, Carsten Murawski, and Stefan Bode. 2015. "Single-Trial Event-Related  
1089 Potential Correlates of Belief Updating(1,2,3)." *eNeuro* 2 (5).  
1090 <https://doi.org/10.1523/ENEURO.0076-15.2015>.
- 1091 Bernardi, Nicolò F., Mohammad Darainy, and David J. Ostry. 2015. "Somatosensory  
1092 Contribution to the Initial Stages of Human Motor Learning." *The Journal of Neuroscience:  
1093 The Official Journal of the Society for Neuroscience* 35 (42): 14316–26.
- 1094 Bhanpuri, Nasir H., Allison M. Okamura, and Amy J. Bastian. 2013. "Predictive Modeling by the  
1095 Cerebellum Improves Proprioception." *The Journal of Neuroscience: The Official Journal of  
1096 the Society for Neuroscience* 33 (36): 14301–6.
- 1097 Bledowski, Christoph, David Prvulovic, Karsten Hoechstetter, Michael Scherg, Michael Wibrall,  
1098 Rainer Goebel, and David E. J. Linden. 2004. "Localizing P300 Generators in Visual Target  
1099 and Distractor Processing: A Combined Event-Related Potential and Functional Magnetic  
1100 Resonance Imaging Study." *The Journal of Neuroscience: The Official Journal of the  
1101 Society for Neuroscience* 24 (42): 9353–60.
- 1102 Bock, O., S. Schneider, and J. Bloomberg. 2001. "Conditions for Interference versus Facilitation  
1103 during Sequential Sensorimotor Adaptation." *Experimental Brain Research. Experimentelle  
1104 Hirnforschung. Experimentation Cerebrale* 138 (3): 359–65.



- 1105 Bond, Alyson, and Malcolm Lader. 1974. "The Use of Analogue Scales in Rating Subjective  
1106 Feelings." *The British Journal of Medical Psychology* 47 (3): 211–18.
- 1107 Brown, Darin R., Sarah Pirio Richardso, and James F. Cavanagh. 2019. "An EEG Marker of  
1108 Reward Processing Is Diminished in Parkinson's Disease." *Brain Research*, November,  
1109 146541.
- 1110 Calhoun, V. D., T. Adali, G. D. Pearlson, and K. A. Kiehl. 2006. "Neuronal Chronometry of  
1111 Target Detection: Fusion of Hemodynamic and Event-Related Potential Data." *NeuroImage*  
1112 30 (2): 544–53.
- 1113 Carlson, Joshua M., Dan Foti, Lilianne R. Mujica-Parodi, Eddie Harmon-Jones, and Greg  
1114 Hajcak. 2011. "Ventral Striatal and Medial Prefrontal BOLD Activation Is Correlated with  
1115 Reward-Related Electrocortical Activity: A Combined ERP and fMRI Study." *NeuroImage*  
1116 57 (4): 1608–16.
- 1117 Cashaback, Joshua G. A., Christopher K. Lao, Dimitrios J. Palidis, Susan K. Coltman, Heather  
1118 R. McGregor, and Paul L. Gribble. 2019. "The Gradient of the Reinforcement Landscape  
1119 Influences Sensorimotor Learning." *PLoS Computational Biology* 15 (3): e1006839.
- 1120 Cashaback, Joshua G. A., Heather R. McGregor, Ayman Mohatarem, and Paul L. Gribble.  
1121 2017. "Dissociating Error-Based and Reinforcement-Based Loss Functions during  
1122 Sensorimotor Learning." *PLoS Computational Biology* 13 (7): e1005623.
- 1123 Cavanagh, James F., and Michael J. Frank. 2014. "Frontal Theta as a Mechanism for Cognitive  
1124 Control." *Trends in Cognitive Sciences* 18 (8): 414–21.
- 1125 Chu, Ching-Lin, I. Hui Lee, Mei Hung Chi, Kao Chin Chen, Po See Chen, Wei Jen Yao, Nan  
1126 Tsing Chiu, and Yen Kuang Yang. 2018. "Availability of Dopamine Transporters and  
1127 Auditory P300 Abnormalities in Adults with Attention-Deficit Hyperactivity Disorder:  
1128 Preliminary Results." *CNS Spectrums* 23 (4): 264–70.
- 1129 Codol, Olivier, Peter J. Holland, and Joseph M. Galea. 2018. "The Relationship between  
1130 Reinforcement and Explicit Control during Visuomotor Adaptation." *Scientific Reports* 8 (1):  
1131 9121.
- 1132 Cools, R., R. A. Barker, B. J. Sahakian, and T. W. Robbins. 2001. "Enhanced or Impaired  
1133 Cognitive Function in Parkinson's Disease as a Function of Dopaminergic Medication and  
1134 Task Demands." *Cerebral Cortex* 11 (12): 1136–43.
- 1135 Cools, Roshan, Lee Altamirano, and Mark D'Esposito. 2006. "Reversal Learning in Parkinson's  
1136 Disease Depends on Medication Status and Outcome Valence." *Neuropsychologia* 44 (10):  
1137 1663–73.
- 1138 Cools, Roshan, Roger A. Barker, Barbara J. Sahakian, and Trevor W. Robbins. 2003. "L-Dopa  
1139 Medication Remediate Cognitive Inflexibility, but Increases Impulsivity in Patients with  
1140 Parkinson's Disease." *Neuropsychologia* 41 (11): 1431–41.
- 1141 Cools, Roshan, Simon J. G. Lewis, Luke Clark, Roger A. Barker, and Trevor W. Robbins. 2007.  
1142 "L-DOPA Disrupts Activity in the Nucleus Accumbens during Reversal Learning in  
1143 Parkinson's Disease." *Neuropsychopharmacology: Official Publication of the American  
1144 College of Neuropsychopharmacology* 32 (1): 180–89.
- 1145 Cooper, J. A., H. J. Sagar, S. M. Doherty, N. Jordan, P. Tidswell, and E. V. Sullivan. 1992.  
1146 "Different Effects of Dopaminergic and Anticholinergic Therapies on Cognitive and Motor  
1147 Function in Parkinson's Disease. A Follow-up Study of Untreated Patients." *Brain: A  
1148 Journal of Neurology* 115 ( Pt 6) (December): 1701–25.

- 1149 Costa, Alberto, Antonella Peppe, Grazia Dell’Agnello, Giovanni Augusto Carlesimo, Luigi Murri,  
1150 Ubaldo Bonuccelli, and Carlo Caltagirone. 2003. “Dopaminergic Modulation of Visual-  
1151 Spatial Working Memory in Parkinson’s Disease.” *Dementia and Geriatric Cognitive*  
1152 *Disorders* 15 (2): 55–66.
- 1153 Daw, Nathaniel D., Samuel J. Gershman, Ben Seymour, Peter Dayan, and Raymond J. Dolan.  
1154 2011. “Model-Based Influences on Humans’ Choices and Striatal Prediction Errors.”  
1155 *Neuron* 69 (6): 1204–15.
- 1156 Daw, Nathaniel D., and Philippe N. Tobler. 2014. “Chapter 15 - Value Learning through  
1157 Reinforcement: The Basics of Dopamine and Reinforcement Learning.” In *Neuroeconomics*  
1158 *(Second Edition)*, edited by Paul W. Glimcher and Ernst Fehr, 283–98. San Diego:  
1159 Academic Press.
- 1160 Delorme, Arnaud, and Scott Makeig. 2004. “EEGLAB: An Open Source Toolbox for Analysis of  
1161 Single-Trial EEG Dynamics Including Independent Component Analysis.” *Journal of*  
1162 *Neuroscience Methods* 134 (1): 9–21.
- 1163 Deserno, Lorenz, Quentin J. M. Huys, Rebecca Boehme, Ralph Buchert, Hans-Jochen Heinze,  
1164 Anthony A. Grace, Raymond J. Dolan, Andreas Heinz, and Florian Schlagenhauf. 2015.  
1165 “Ventral Striatal Dopamine Reflects Behavioral and Neural Signatures of Model-Based  
1166 Control during Sequential Decision Making.” *Proceedings of the National Academy of*  
1167 *Sciences of the United States of America* 112 (5): 1595–1600.
- 1168 Dhawale, Ashesh K., Yohsuke R. Miyamoto, Maurice A. Smith, and Bence P. Ölveczky. 2019.  
1169 “Adaptive Regulation of Motor Variability.” *Current Biology: CB* 29 (21): 3551–62.e7.
- 1170 Dhawale, Ashesh K., Maurice A. Smith, and Bence P. Ölveczky. 2017. “The Role of Variability  
1171 in Motor Learning.” *Annual Review of Neuroscience* 40 (July): 479–98.
- 1172 Diedrichsen, Jörn, Yasmin Hashambhoy, Tushar Rane, and Reza Shadmehr. 2005. “Neural  
1173 Correlates of Reach Errors.” *The Journal of Neuroscience: The Official Journal of the*  
1174 *Society for Neuroscience* 25 (43): 9919–31.
- 1175 Dolan, Ray J., and Peter Dayan. 2013. “Goals and Habits in the Brain.” *Neuron* 80 (2): 312–25.
- 1176 Doll, Bradley B., Kevin G. Bath, Nathaniel D. Daw, and Michael J. Frank. 2016. “Variability in  
1177 Dopamine Genes Dissociates Model-Based and Model-Free Reinforcement Learning.” *The*  
1178 *Journal of Neuroscience: The Official Journal of the Society for Neuroscience* 36 (4): 1211–  
1179 22.
- 1180 Donchin, Emanuel, and Michael G. H. Coles. 1988. “Is the P300 Component a Manifestation of  
1181 Context Updating?” *The Behavioral and Brain Sciences* 11 (3): 357–74.
- 1182 Emeric, Erik E., Joshua W. Brown, Melanie Leslie, Pierre Pouget, Veit Stuphorn, and Jeffrey D.  
1183 Schall. 2008. “Performance Monitoring Local Field Potentials in the Medial Frontal Cortex of  
1184 Primates: Anterior Cingulate Cortex.” *Journal of Neurophysiology* 99 (2): 759–72.
- 1185 Enge, Sören, Hendrik Mothes, Monika Fleischhauer, Andreas Reif, and Alexander Strobel.  
1186 2017. “Genetic Variation of Dopamine and Serotonin Function Modulates the Feedback-  
1187 Related Negativity during Altruistic Punishment.” *Scientific Reports* 7 (1): 2996.
- 1188 Feigin, A., M. F. Ghilardi, M. Carbon, C. Edwards, M. Fukuda, V. Dhawan, C. Margouleff, C.  
1189 Ghez, and D. Eidelberg. 2003. “Effects of Levodopa on Motor Sequence Learning in  
1190 Parkinson’s Disease.” *Neurology* 60 (11): 1744–49.
- 1191 Feldman, Harriet, and Karl J. Friston. 2010. “Attention, Uncertainty, and Free-Energy.” *Frontiers*  
1192 *in Human Neuroscience* 4 (December): 215.

- 1193 Flöel, Agnes, Caterina Breitenstein, Friedhelm Hummel, Pablo Celnik, Christian Gingert, Lumy  
1194 Sawaki, Stefan Knecht, and Leonardo G. Cohen. 2005. "Dopaminergic Influences on  
1195 Formation of a Motor Memory." *Annals of Neurology* 58 (1): 121–30.
- 1196 Folstein, Jonathan R., and Cyma Van Petten. 2008. "Influence of Cognitive Control and  
1197 Mismatch on the N2 Component of the ERP: A Review." *Psychophysiology* 45 (1): 152–70.
- 1198 Forster, Sarah E., Patrick Zirnheld, Anantha Shekhar, Stuart R. Steinhauer, Brian F. O'Donnell,  
1199 and William P. Hetrick. 2017. "Event-Related Potentials Reflect Impaired Temporal Interval  
1200 Learning Following Haloperidol Administration." *Psychopharmacology* 234 (17): 2545–62.
- 1201 Foti, Dan, Anna Weinberg, Joseph Dien, and Greg Hajcak. 2011. "Event-Related Potential  
1202 Activity in the Basal Ganglia Differentiates Rewards from Nonrewards: Temporospatial  
1203 Principal Components Analysis and Source Localization of the Feedback Negativity."  
1204 *Human Brain Mapping* 32 (12): 2207–16.
- 1205 Frank, Michael J., Lauren C. Seeberger, and Randall C. O'Reilly. 2004. "By Carrot or by Stick:  
1206 Cognitive Reinforcement Learning in Parkinsonism." *Science* 306 (5703): 1940–43.
- 1207 Frank, Michael J., Brion S. Worocho, and Tim Curran. 2005. "Error-Related Negativity Predicts  
1208 Reinforcement Learning and Conflict Biases." *Neuron* 47 (4): 495–501.
- 1209 Galea, Joseph M., Elizabeth Mallia, John Rothwell, and Jörn Diedrichsen. 2015. "The  
1210 Dissociable Effects of Punishment and Reward on Motor Learning." *Nature Neuroscience*  
1211 18 (4): 597–602.
- 1212 García-García, Isabel, Yashar Zeighami, and Alain Dagher. 2017. "Reward Prediction Errors in  
1213 Drug Addiction and Parkinson's Disease: From Neurophysiology to Neuroimaging." *Current*  
1214 *Neurology and Neuroscience Reports* 17 (6): 46.
- 1215 Gardner Matthew P. H., Schoenbaum Geoffrey, and Gershman Samuel J. 2018. "Rethinking  
1216 Dopamine as Generalized Prediction Error." *Proceedings of the Royal Society B: Biological*  
1217 *Sciences* 285 (1891): 20181645.
- 1218 Gehring, William J., and Adrian R. Willoughby. 2002. "The Medial Frontal Cortex and the Rapid  
1219 Processing of Monetary Gains and Losses." *Science* 295 (5563): 2279–82.
- 1220 Gläscher, Jan, Nathaniel Daw, Peter Dayan, and John P. O'Doherty. 2010. "States versus  
1221 Rewards: Dissociable Neural Prediction Error Signals Underlying Model-Based and Model-  
1222 Free Reinforcement Learning." *Neuron* 66 (4): 585–95.
- 1223 Graef, Susanne, Guido Biele, Lea K. Krugel, Frank Marzinzik, Michael Wahl, Johann Wotka,  
1224 Fabian Klostermann, and Hauke R. Heekeren. 2010. "Differential Influence of Levodopa on  
1225 Reward-Based Learning in Parkinson's Disease." *Frontiers in Human Neuroscience* 4  
1226 (October): 169.
- 1227 Hansenne, M., W. Pitchot, A. Gonzalez Moreno, P. Papart, M. Timsit-Berthier, and M. Ansseau.  
1228 1995. "Catecholaminergic Function and P300 Amplitude in Major Depressive Disorder  
1229 (P300 and Catecholamines)." *Electroencephalography and Clinical Neurophysiology* 96 (2):  
1230 194–96.
- 1231 Harper, Jeremy, Stephen M. Malone, and Edward M. Bernat. 2014. "Theta and Delta Band  
1232 Activity Explain N2 and P3 ERP Component Activity in a Go/no-Go Task." *Clinical*  
1233 *Neurophysiology: Official Journal of the International Federation of Clinical*  
1234 *Neurophysiology* 125 (1): 124–32.
- 1235 Hauser, Tobias U., Reto Iannaccone, Philipp Stämpfli, Renate Drechsler, Daniel Brandeis,  
1236 Susanne Walitza, and Silvia Brem. 2014. "The Feedback-Related Negativity (FRN)

- 1237 Revisited: New Insights into the Localization, Meaning and Network Organization.”  
1238 *NeuroImage* 84 (January): 159–68.
- 1239 Helden, Jurjen van der, Maarten A. S. Boksem, and Jorian H. G. Blom. 2010. “The Importance  
1240 of Failure: Feedback-Related Negativity Predicts Motor Learning Efficiency.” *Cerebral*  
1241 *Cortex* 20 (7): 1596–1603.
- 1242 Hiebert, Nole M., Ken N. Seergobin, Andrew Vo, Hooman Ganjavi, and Penny A. MacDonald.  
1243 2014. “Dopaminergic Therapy Affects Learning and Impulsivity in Parkinson’s Disease.”  
1244 *Annals of Clinical and Translational Neurology* 1 (10): 833–43.
- 1245 Holland, Peter, Olivier Codol, and Joseph M. Galea. 2018. “Contribution of Explicit Processes to  
1246 Reinforcement-Based Motor Learning.” *Journal of Neurophysiology* 119 (6): 2241–55.
- 1247 Holland, Peter, Olivier Codol, Elizabeth Oxley, Madison Taylor, Elizabeth Hamshere, Shadiq  
1248 Joseph, Laura Huffer, and Joseph M. Galea. 2019. “Domain-Specific Working Memory, But  
1249 Not Dopamine-Related Genetic Variability, Shapes Reward-Based Motor Learning.” *The*  
1250 *Journal of Neuroscience: The Official Journal of the Society for Neuroscience* 39 (47):  
1251 9383–96.
- 1252 Holroyd, Clay B., and M. G. H. Coles. 2002. “The Neural Basis of Human Error Processing:  
1253 Reinforcement Learning, Dopamine, and the Error-Related Negativity.” *Psychological*  
1254 *Review* 109 (4): 679–709.
- 1255 Holroyd, Clay B., and Olave E. Krigolson. 2007. “Reward Prediction Error Signals Associated  
1256 with a Modified Time Estimation Task.” *Psychophysiology* 44 (6): 913–17.
- 1257 Holroyd, Clay B., Kaivon L. Pakzad-Vaezi, and Olave E. Krigolson. 2008. “The Feedback  
1258 Correct-Related Positivity: Sensitivity of the Event-Related Brain Potential to Unexpected  
1259 Positive Feedback.” *Psychophysiology* 45 (5): 688–97.
- 1260 Huang, Vincent S., Adrian Haith, Pietro Mazzoni, and John W. Krakauer. 2011a. “Rethinking  
1261 Motor Learning and Savings in Adaptation Paradigms: Model-Free Memory for Successful  
1262 Actions Combines with Internal Models.” *Neuron* 70 (4): 787–801.
- 1263 Ito, Masao. 2000. “Mechanisms of Motor Learning in the cerebellum1.” *Brain Research,*  
1264 *Towards 2010, A brain Odyssey, The 3rd Brain Research Interactive*, 886 (1–2): 237–45.
- 1265 Izawa, Jun, and Reza Shadmehr. 2011a. “Learning from Sensory and Reward Prediction Errors  
1266 during Motor Adaptation.” *PLoS Computational Biology* 7 (3): e1002012.
- 1267 Jahanshahi, Marjan, Leonora Wilkinson, Harpreet Gahir, Angeline Dharmaindra, and David A.  
1268 Lagnado. 2010. “Medication Impairs Probabilistic Classification Learning in Parkinson’s  
1269 Disease.” *Neuropsychologia* 48 (4): 1096–1103.
- 1270 Jocham, Gerhard, and Markus Ullsperger. 2009. “Neuropharmacology of Performance  
1271 Monitoring.” *Neuroscience and Biobehavioral Reviews* 33 (1): 48–60.
- 1272 Johnson, Joseph F., Michel Belyk, Michael Schwartz, Ana P. Pinheiro, and Sonja A. Kotz.  
1273 2019. “The Role of the Cerebellum in Adaptation: ALE Meta-Analyses on Sensory  
1274 Feedback Error.” *Human Brain Mapping* 40 (13): 3966–81.
- 1275 Jonker, Zeb D., Rick van der Vliet, Guido Maquelin, Joris van der Crujisen, Gerard M. Ribbers,  
1276 Ruud W. Selles, Opher Donchin, and Maarten A. Frens. n.d. “Individual Differences in  
1277 Frontal Midline Theta Activity during Visuomotor Adaptation Are Related to Execution  
1278 Noise.” <https://doi.org/10.1101/2020.07.12.188581>.
- 1279 Kim, Hyosub E., Darius E. Parvin, and Richard B. Ivry. 2018. “Intrinsic Rewards Modulate  
1280 Sensorimotor Adaptation.” *bioRxiv*. <https://doi.org/10.1101/363606>.



- 1281 Kim, Hyosub E., Darius E. Parvin, and Richard B. Ivry. 2019. "The Influence of Task Outcome  
1282 on Implicit Motor Learning." *eLife* 8 (April). <https://doi.org/10.7554/eLife.39882>.
- 1283 Knecht, Stefan, Caterina Breitenstein, Stefan Bushuven, Stefanie Wailke, Sandra Kamping,  
1284 Agnes Flöel, Pienie Zwitserlood, and E. Bernd Ringelstein. 2004. "Levodopa: Faster and  
1285 Better Word Learning in Normal Humans." *Annals of Neurology* 56 (1): 20–26.
- 1286 Kooij, Katinka van der, Leonie Oostwoud Wijdenes, Tessa Rigterink, Krista E. Overvliet, and  
1287 Joeren B. J. Smeets. 2018. "Reward Abundance Interferes with Error-Based Learning in a  
1288 Visuomotor Adaptation Task." *PloS One* 13 (3): e0193002.
- 1289 Kooij, Katinka van der, and Jeroen B. J. Smeets. 2019. "Reward-Based Motor Adaptation Can  
1290 Generalize across Actions." *Journal of Experimental Psychology. Learning, Memory, and*  
1291 *Cognition* 45 (1): 71–81.
- 1292 Krakauer, John W., Claude Ghez, and M. Felice Ghilardi. 2005. "Adaptation to Visuomotor  
1293 Transformations: Consolidation, Interference, and Forgetting." *The Journal of*  
1294 *Neuroscience: The Official Journal of the Society for Neuroscience* 25 (2): 473–78.
- 1295 Krakauer, John W., Maria-Felice Ghilardi, Marc Mentis, Anna Barnes, Milana Veytsman, David  
1296 Eidelberg, and Claude Ghez. 2004. "Differential Cortical and Subcortical Activations in  
1297 Learning Rotations and Gains for Reaching: A PET Study." *Journal of Neurophysiology* 91  
1298 (2): 924–33.
- 1299 Krigolson, Olav E., and Clay B. Holroyd. 2007. "Hierarchical Error Processing: Different Errors,  
1300 Different Systems." *Brain Research* 1155 (June): 70–80.
- 1301 Kuling, Irene A., Anouk J. de Brouwer, Jeroen B. J. Smeets, and J. Randall Flanagan. 2019.  
1302 "Correcting for Natural Visuo-Proprioceptive Matching Errors Based on Reward as  
1303 Opposed to Error Feedback Does Not Lead to Higher Retention." *Experimental Brain*  
1304 *Research. Experimentelle Hirnforschung. Experimentation Cerebrale* 237 (3): 735–41.
- 1305 Kulisevsky, J. 2000. "Role of Dopamine in Learning and Memory: Implications for the Treatment  
1306 of Cognitive Dysfunction in Patients with Parkinson's Disease." *Drugs & Aging* 16 (5): 365–  
1307 79.
- 1308 Kumar, Neeraj, Timothy F. Manning, and David J. Ostry. 2019. "Somatosensory Cortex  
1309 Participates in the Consolidation of Human Motor Memory." *PLoS Biology* 17 (10):  
1310 e3000469.
- 1311 Kwak, Youngbin, Martijn L. T. M. Müller, Nicolaas I. Bohnen, Praveen Dayalu, and Rachael D.  
1312 Seidler. 2010. "Effect of Dopaminergic Medications on the Time Course of Explicit Motor  
1313 Sequence Learning in Parkinson's Disease." *Journal of Neurophysiology* 103 (2): 942–49.
- 1314 Lange, K. W., T. W. Robbins, C. D. Marsden, M. James, A. M. Owen, and G. M. Paul. 1992. "L-  
1315 Dopa Withdrawal in Parkinson's Disease Selectively Impairs Cognitive Performance in  
1316 Tests Sensitive to Frontal Lobe Dysfunction." *Psychopharmacology* 107 (2-3): 394–404.
- 1317 Leow, Li-Ann, Andrea M. Loftus, and Geoffrey R. Hammond. 2012. "Impaired Savings despite  
1318 Intact Initial Learning of Motor Adaptation in Parkinson's Disease." *Experimental Brain*  
1319 *Research. Experimentelle Hirnforschung. Experimentation Cerebrale* 218 (2): 295–304.
- 1320 Leow, Li-Ann, Welber Marinovic, Aymar de Rugy, and Timothy J. Carroll. 2018. "Task Errors  
1321 Contribute to Implicit Aftereffects in Sensorimotor Adaptation." *The European Journal of*  
1322 *Neuroscience* 48 (11): 3397–3409.
- 1323 Leow, Li-Ann, Aymar de Rugy, Andrea M. Loftus, and Geoff Hammond. 2013. "Different  
1324 Mechanisms Contributing to Savings and Anterograde Interference Are Impaired in



- 1325            Parkinson's Disease." *Frontiers in Human Neuroscience* 7 (February): 55.
- 1326    Leow, Li-Ann, Aymar de Rugy, Welber Marinovic, Stephan Riek, and Timothy J. Carroll. 2016.
- 1327            "Savings for Visuomotor Adaptation Require Prior History of Error, Not Prior Repetition of
- 1328            Successful Actions." *Journal of Neurophysiology* 116 (4): 1603–14.
- 1329    Lewis, Simon J. G., Aleksandra Slabosz, Trevor W. Robbins, Roger A. Barker, and Adrian M.
- 1330            Owen. 2005. "Dopaminergic Basis for Deficits in Working Memory but Not Attentional Set-
- 1331            Shifting in Parkinson's Disease." *Neuropsychologia* 43 (6): 823–32.
- 1332    Li, Yuezhi, Li-Qun Wang, and Yong Hu. 2009. "Localizing P300 Generators in High-Density
- 1333            Event- Related Potential with fMRI." *Medical Science Monitor: International Medical Journal*
- 1334            *of Experimental and Clinical Research* 15 (3): MT47–53.
- 1335    MacDonald, Penny A., Alex A. MacDonald, Ken N. Seergobin, Ruzbeh Tamjeedi, Hooman
- 1336            Ganjavi, Jean-Sebastien Provost, and Oury Monchi. 2011. "The Effect of Dopamine
- 1337            Therapy on Ventral and Dorsal Striatum-Mediated Cognition in Parkinson's Disease:
- 1338            Support from Functional MRI." *Brain: A Journal of Neurology* 134 (Pt 5): 1447–63.
- 1339    MacLean, Stephane J., Cameron D. Hassall, Yoko Ishigami, Olav E. Krigolson, and Gail A.
- 1340            Eskes. 2015. "Using Brain Potentials to Understand Prism Adaptation: The Error-Related
- 1341            Negativity and the P300." *Frontiers in Human Neuroscience* 9 (June).
- 1342    Mantini, Dante, Maurizio Corbetta, Mauro Gianni Perrucci, Gian Luca Romani, and Cosimo Del
- 1343            Gratta. 2009. "Large-Scale Brain Networks Account for Sustained and Transient Activity
- 1344            during Target Detection." *NeuroImage* 44 (1): 265–74.
- 1345    Marco-Pallarés, Josep, David Cucurell, Toni Cunillera, Ulrike M. Krämer, Estela Càmara, Wido
- 1346            Nager, Peter Bauer, et al. 2009. "Genetic Variability in the Dopamine System (dopamine
- 1347            Receptor D4, Catechol-O-Methyltransferase) Modulates Neurophysiological Responses to
- 1348            Gains and Losses." *Biological Psychiatry* 66 (2): 154–61.
- 1349    Marini, P., S. Ramat, A. Ginestroni, and M. Paganini. 2003. "Deficit of Short-Term Memory in
- 1350            Newly Diagnosed Untreated Parkinsonian Patients: Reversal after L-Dopa Therapy."
- 1351            *Neurological Sciences: Official Journal of the Italian Neurological Society and of the Italian*
- 1352            *Society of Clinical Neurophysiology* 24 (3): 184–85.
- 1353    Mars, Rogier B., Stefan Debener, Thomas E. Gladwin, Lee M. Harrison, Patrick Haggard, John
- 1354            C. Rothwell, and Sven Bestmann. 2008. "Trial-by-Trial Fluctuations in the Event-Related
- 1355            Electroencephalogram Reflect Dynamic Changes in the Degree of Surprise." *The Journal of*
- 1356            *Neuroscience: The Official Journal of the Society for Neuroscience* 28 (47): 12539–45.
- 1357    Martínez-Horta, Saul, Jordi Riba, Ramón Fernández de Bobadilla, Javier Pagonabarraga, Berta
- 1358            Pascual-Sedano, Rosa Maria Antonijoan, Sergio Romero, Miquel Àngel Mañanas, Carmen
- 1359            García-Sánchez, and Jaime Kulisevsky. 2014. "Apathy in Parkinson's Disease:
- 1360            Neurophysiological Evidence of Impaired Incentive Processing." *The Journal of*
- 1361            *Neuroscience: The Official Journal of the Society for Neuroscience* 34 (17): 5918–26.
- 1362    Maschke, Matthias, Christopher M. Gomez, Timothy J. Ebner, and Jürgen Konczak. 2004.
- 1363            "Hereditary Cerebellar Ataxia Progressively Impairs Force Adaptation during Goal-Directed
- 1364            Arm Movements." *Journal of Neurophysiology* 91 (1): 230–38.
- 1365    Mastriqt, Nina M. van, Jeroen B. J. Smeets, and Katinka van der Kooij. 2019. "Quantifying
- 1366            Exploration in Reward-Based Motor Learning." *bioRxiv*. <https://doi.org/10.1101/869735>.
- 1367    Mathewson, Karen J., Jane Dywan, Peter J. Snyder, William J. Tays, and Sidney J. Segalowitz.
- 1368            2008. "Aging and Electrocutaneous Response to Error Feedback during a Spatial Learning

- 1369 Task." *Psychophysiology* 45 (6): 936–48.
- 1370 Mathis, Mackenzie Weygandt, Alexander Mathis, and Naoshige Uchida. 2017. "Somatosensory  
1371 Cortex Plays an Essential Role in Forelimb Motor Adaptation in Mice." *Neuron* 93 (6):  
1372 1493–1503.e6.
- 1373 Mazzoni, Pietro, and John W. Krakauer. 2006. "An Implicit Plan Overrides an Explicit Strategy  
1374 during Visuomotor Adaptation." *The Journal of Neuroscience: The Official Journal of the*  
1375 *Society for Neuroscience* 26 (14): 3642–45.
- 1376 McDougle, Samuel D., Matthew J. Boggess, Matthew J. Crossley, Darius Parvin, Richard B.  
1377 Ivry, and Jordan A. Taylor. 2016. "Credit Assignment in Movement-Dependent  
1378 Reinforcement Learning." *Proceedings of the National Academy of Sciences of the United*  
1379 *States of America* 113 (24): 6797–6802.
- 1380 Mehler, David Marc Anton, Alexandra Reichenbach, Julius Klein, and Jörn Diedrichsen. 2017.  
1381 "Minimizing Endpoint Variability through Reinforcement Learning during Reaching  
1382 Movements Involving Shoulder, Elbow and Wrist." *PloS One* 12 (7): e0180803.
- 1383 Miall, R. Chris, Lars O. D. Christensen, Owen Cain, and James Stanley. 2007. "Disruption of  
1384 State Estimation in the Human Lateral Cerebellum." *PLoS Biology* 5 (11): e316.
- 1385 Miall, R. Christopher, Ned Jenkinson, and Kunal Kulkarni. 2004. "Adaptation to Rotated Visual  
1386 Feedback: A Re-Examination of Motor Interference." *Experimental Brain Research.*  
1387 *Experimentelle Hirnforschung. Experimentation Cerebrale* 154 (2): 201–10.
- 1388 Miltner, W. H., C. H. Braun, and M. G. Coles. 1997. "Event-Related Brain Potentials Following  
1389 Incorrect Feedback in a Time-Estimation Task: Evidence for a 'Generic' Neural System for  
1390 Error Detection." *Journal of Cognitive Neuroscience* 9 (6): 788–98.
- 1391 Montgomery, Douglas C., Elizabeth A. Peck, and G. Geoffrey Vining. 2015. *Introduction to*  
1392 *Linear Regression Analysis*. John Wiley & Sons.
- 1393 Moustafa, Ahmed A., Scott J. Sherman, and Michael J. Frank. 2008. "A Dopaminergic Basis for  
1394 Working Memory, Learning and Attentional Shifting in Parkinsonism." *Neuropsychologia* 46  
1395 (13): 3144–56.
- 1396 Mueller, Erik M., Christin Burgdorf, Mira-Lynn Chavanon, Desiree Schweiger, Jürgen Hennig,  
1397 Jan Wacker, and Gerhard Stemmler. 2014. "The COMT Val158Met Polymorphism  
1398 Regulates the Effect of a Dopamine Antagonist on the Feedback-Related Negativity."  
1399 *Psychophysiology* 51 (8): 805–9.
- 1400 Mulert, Christoph, Georg Juckel, Ina Giegling, Oliver Pogarell, Gregor Leicht, Susanne Karch,  
1401 Paraskevi Mavrogiorgou, Hans-Jürgen Möller, Ulrich Hegerl, and Dan Rujescu. 2006. "A  
1402 Ser9Gly Polymorphism in the Dopamine D3 Receptor Gene (DRD3) and Event-Related  
1403 P300 Potentials." *Neuropsychopharmacology: Official Publication of the American College*  
1404 *of Neuropsychopharmacology* 31 (6): 1335–44.
- 1405 Nikooyan, Ali A., and Alaa A. Ahmed. 2015. "Reward Feedback Accelerates Motor Learning."  
1406 *Journal of Neurophysiology* 113 (2): 633–46.
- 1407 Noble, E. P., S. M. Berman, T. Z. Ozkaragoz, and T. Ritchie. 1994. "Prolonged P300 Latency in  
1408 Children with the D2 Dopamine Receptor A1 Allele." *American Journal of Human Genetics*  
1409 54 (4): 658–68.
- 1410 Olanow, W., A. H. Schapira, and O. Rascol. 2000. "Continuous Dopamine-Receptor Stimulation  
1411 in Early Parkinson's Disease." *Trends in Neurosciences* 23 (10 Suppl): S117–26.
- 1412 Onur, Özgür A., Martina Piefke, Chuh-Hyoun Lie, Christiane M. Thiel, and Gereon R. Fink.

- 1413 2011. "Modulatory Effects of Levodopa on Cognitive Control in Young but Not in Older  
1414 Subjects: A Pharmacological fMRI Study." *Journal of Cognitive Neuroscience* 23 (10):  
1415 2797–2810.
- 1416 Ostry, David J., and Paul L. Gribble. 2016. "Sensory Plasticity in Human Motor Learning."  
1417 *Trends in Neurosciences* 39 (2): 114–23.
- 1418 Otani, Satoru, Herve Daniel, Marie-Paule Roisin, and Francis Crepel. 2003. "Dopaminergic  
1419 Modulation of Long-Term Synaptic Plasticity in Rat Prefrontal Neurons." *Cerebral Cortex*  
1420 13 (11): 1251–56.
- 1421 Palidis, Dimitrios J., Joshua G. A. Cashaback, and Paul L. Gribble. 2019. "Neural Signatures of  
1422 Reward and Sensory Error Feedback Processing in Motor Learning." *Journal of*  
1423 *Neurophysiology* 121 (4): 1561–74.
- 1424 Pekny, Sarah E., Jun Izawa, and Reza Shadmehr. 2015. "Reward-Dependent Modulation of  
1425 Movement Variability." *Journal of Neuroscience* 35 (9): 4015–24.
- 1426 Pogarell, Oliver, Frank Padberg, Susanne Karch, Felix Segmiller, Georg Juckel, Christoph  
1427 Mulert, Ulrich Hegerl, Klaus Tatsch, and Walter Koch. 2011. "Dopaminergic Mechanisms of  
1428 Target Detection - P300 Event Related Potential and Striatal Dopamine." *Psychiatry*  
1429 *Research* 194 (3): 212–18.
- 1430 Polich, John. 2007. "Updating P300: An Integrative Theory of P3a and P3b." *Clinical*  
1431 *Neurophysiology: Official Journal of the International Federation of Clinical*  
1432 *Neurophysiology* 118 (10): 2128–48.
- 1433 Quattrocchi, Graziella, Jessica Monaco, Andy Ho, Friederike Irmen, Wolfgang Strube, Diane  
1434 Ruge, Sven Bestmann, and Joseph M. Galea. 2018. "Pharmacological Dopamine  
1435 Manipulation Does Not Alter Reward-Based Improvements in Memory Retention during a  
1436 Visuomotor Adaptation Task." *eNeuro* 5 (3). [https://doi.org/10.1523/ENEURO.0453-](https://doi.org/10.1523/ENEURO.0453-17.2018)  
1437 17.2018.
- 1438 Ragazzoni, Aldo, Francesco Di Russo, Serena Fabbri, Ilaria Pesaresi, Andrea Di Rollo, Rinaldo  
1439 Livio Perri, Davide Barloscio, Tommaso Bocci, Mirco Cosottini, and Ferdinando Sartucci.  
1440 2019. "'Hit the Missing Stimulus'. A Simultaneous EEG-fMRI Study to Localize the  
1441 Generators of Endogenous ERPs in an Omitted Target Paradigm." *Scientific Reports* 9 (1):  
1442 3684.
- 1443 Reynolds, John N. J., and Jeffery R. Wickens. 2002. "Dopamine-Dependent Plasticity of  
1444 Corticostriatal Synapses." *Neural Networks: The Official Journal of the International Neural*  
1445 *Network Society* 15 (4-6): 507–21.
- 1446 Rothenhoefer, Kathryn M., Vincent D. Costa, Ramón Bartolo, Raquel Vicario-Feliciano,  
1447 Elisabeth A. Murray, and Bruno B. Averbeck. 2017. "Effects of Ventral Striatum Lesions on  
1448 Stimulus-Based versus Action-Based Reinforcement Learning." *The Journal of*  
1449 *Neuroscience: The Official Journal of the Society for Neuroscience* 37 (29): 6902–14.
- 1450 Russek, Evan M., Ida Momennejad, Matthew M. Botvinick, Samuel J. Gershman, and Nathaniel  
1451 D. Daw. 2017. "Predictive Representations Can Link Model-Based Reinforcement Learning  
1452 to Model-Free Mechanisms." *PLoS Computational Biology* 13 (9): e1005768.
- 1453 Sabeti, M., S. D. Katebi, K. Rastgar, and Z. Azimifar. 2016. "A Multi-Resolution Approach to  
1454 Localize Neural Sources of P300 Event-Related Brain Potential." *Computer Methods and*  
1455 *Programs in Biomedicine* 133 (September): 155–68.
- 1456 Sambrook, Thomas D., and Jeremy Goslin. 2015. "A Neural Reward Prediction Error Revealed

- 1457 by a Meta-Analysis of ERPs Using Great Grand Averages.” *Psychological Bulletin* 141 (1):  
1458 213–35.
- 1459 Sambrook, Thomas D., and Jeremy Goslin. 2016. “Principal Components Analysis of Reward  
1460 Prediction Errors in a Reinforcement Learning Task.” *NeuroImage* 124 (Pt A): 276–86.
- 1461 Sambrook, Thomas D., Ben Hardwick, Andy J. Wills, and Jeremy Goslin. 2018. “Model-Free  
1462 and Model-Based Reward Prediction Errors in EEG.” *NeuroImage* 178 (September): 162–  
1463 71.
- 1464 Santesso, Diane L., A. Eden Evins, Michael J. Frank, Erika C. Schetter, Ryan Bogdan, and  
1465 Diego A. Pizzagalli. 2009. “Single Dose of a Dopamine Agonist Impairs Reinforcement  
1466 Learning in Humans: Evidence from Event-Related Potentials and Computational Modeling  
1467 of Striatal-Cortical Function.” *Human Brain Mapping* 30 (7): 1963–76.
- 1468 Savoie, F-A, F. Thénault, K. Whittingstall, and P-M Bernier. 2018. “Visuomotor Prediction Errors  
1469 Modulate EEG Activity Over Parietal Cortex.” *Scientific Reports* 8 (1): 12513.
- 1470 Schultz, Wolfram, Peter Dayan, and P. Read Montague. 1997. “A Neural Substrate of Prediction  
1471 and Reward.” *Science* 275 (5306): 1593–99.
- 1472 Schutte, Iris, Peter K. H. Deschamps, Peter N. van Harten, and J. Leon Kenemans. 2020.  
1473 “Dopaminergic and Noradrenergic Manipulation of Anticipatory Reward and Probability  
1474 Event-Related Potentials.” *Psychopharmacology*, April. [https://doi.org/10.1007/s00213-020-](https://doi.org/10.1007/s00213-020-05515-x)  
1475 [05515-x](https://doi.org/10.1007/s00213-020-05515-x).
- 1476 Shadmehr, Reza, Maurice A. Smith, and John W. Krakauer. 2010. “Error Correction, Sensory  
1477 Prediction, and Adaptation in Motor Control.” *Annual Review of Neuroscience* 33: 89–108.
- 1478 Shahar, Nitzan, Rani Moran, Tobias U. Hauser, Rogier A. Kievit, Daniel McNamee, Michael  
1479 Moutoussis, NSPN Consortium, and Raymond J. Dolan. 2019. “Credit Assignment to State-  
1480 Independent Task Representations and Its Relationship with Model-Based Decision  
1481 Making.” *Proceedings of the National Academy of Sciences of the United States of America*  
1482 116 (32): 15871–76.
- 1483 Sharpe, Melissa J., Chun Yun Chang, Melissa A. Liu, Hannah M. Batchelor, Lauren E. Mueller,  
1484 Joshua L. Jones, Yael Niv, and Geoffrey Schoenbaum. 2017. “Dopamine Transients Are  
1485 Sufficient and Necessary for Acquisition of Model-Based Associations.” *Nature*  
1486 *Neuroscience* 20 (5): 735–42.
- 1487 Sharp, Madeleine E., Karin Foerde, Nathaniel D. Daw, and Daphna Shohamy. 2016. “Dopamine  
1488 Selectively Remediate ‘Model-Based’ Reward Learning: A Computational Approach.”  
1489 *Brain: A Journal of Neurology* 139 (Pt 2): 355–64.
- 1490 Shmuelof, Lior, Vincent S. Huang, Adrian M. Haith, Raymond J. Delnicki, Pietro Mazzoni, and  
1491 John W. Krakauer. 2012. “Overcoming Motor ‘‘Forgetting’’ Through Reinforcement Of  
1492 Learned Actions.” *The Journal of Neuroscience: The Official Journal of the Society for*  
1493 *Neuroscience* 32 (42): 14617–21a.
- 1494 Sidarta, Ananda, Shahabeddin Vahdat, Nicolò F. Bernardi, and David J. Ostry. 2016. “Somatic  
1495 and Reinforcement-Based Plasticity in the Initial Stages of Human Motor Learning.” *The*  
1496 *Journal of Neuroscience: The Official Journal of the Society for Neuroscience* 36 (46):  
1497 11682–92.
- 1498 Sidarta, Ananda, Floris T. van Vugt, and David J. Ostry. 2018. “Somatosensory Working  
1499 Memory in Human Reinforcement-Based Motor Learning.” *Journal of Neurophysiology* 120  
1500 (6): 3275–86.



- 1501 Sing, Gary C., and Maurice A. Smith. 2010. "Reduction in Learning Rates Associated with  
1502 Anterograde Interference Results from Interactions between Different Timescales in Motor  
1503 Adaptation." *PLoS Computational Biology* 6 (8).  
1504 <https://doi.org/10.1371/journal.pcbi.1000893>.
- 1505 Smith, Maurice A., and Reza Shadmehr. 2005. "Intact Ability to Learn Internal Models of Arm  
1506 Dynamics in Huntington's Disease but Not Cerebellar Degeneration." *Journal of*  
1507 *Neurophysiology* 93 (5): 2809–21.
- 1508 Sohn, Y. H., G. W. Kim, K. Huh, and J. S. Kim. 1998. "Dopaminergic Influences on the P300  
1509 Abnormality in Parkinson's Disease." *Journal of the Neurological Sciences* 158 (1): 83–87.
- 1510 Soltani, M., and R. T. Knight. 2000. "Neural Origins of the P300." *Critical Reviews in*  
1511 *Neurobiology* 14 (3-4): 199–224.
- 1512 Stanzione, P., F. Fattapposta, P. Giunti, C. D'Alessio, M. Tagliati, C. Affricano, and G. Amabile.  
1513 1991. "P300 Variations in Parkinsonian Patients before and during Dopaminergic  
1514 Monotherapy: A Suggested Dopamine Component in P300." *Electroencephalography and*  
1515 *Clinical Neurophysiology* 80 (5): 446–53.
- 1516 Stanzione, P., M. Tagliati, M. G. Marciani, F. Fattapposta, C. D'alessio, A. Foti, and G. Amabile.  
1517 1990. "Dopaminergic Pharmacological Manipulations in Normal Humans Confirm the  
1518 Specificity of the Visual (PERG-VEP) and Cognitive (P300) Electrophysiological Alterations  
1519 in Parkinson's Disease." In *New Trends and Advanced Techniques in Clinical*  
1520 *Neurophysiology*, edited by Paolo M. Rossini and François Mauguière, 216–20. Elsevier.
- 1521 Swainson, R., R. D. Rogers, B. J. Sahakian, B. A. Summers, C. E. Polkey, and T. W. Robbins.  
1522 2000. "Probabilistic Learning and Reversal Deficits in Patients with Parkinson's Disease or  
1523 Frontal or Temporal Lobe Lesions: Possible Adverse Effects of Dopaminergic Medication."  
1524 *Neuropsychologia* 38 (5): 596–612.
- 1525 Synofzik, Matthis, Axel Lindner, and Peter Thier. 2008. "The Cerebellum Updates Predictions  
1526 about the Visual Consequences of One's Behavior." *Current Biology: CB* 18 (11): 814–18.
- 1527 Takeshita, S., and C. Ogura. 1994. "Effect of the Dopamine D2 Antagonist Sulpiride on Event-  
1528 Related Potentials and Its Relation to the Law of Initial Value." *International Journal of*  
1529 *Psychophysiology: Official Journal of the International Organization of Psychophysiology* 16  
1530 (1): 99–106.
- 1531 Tanaka, Hirokazu, Terrence J. Sejnowski, and John W. Krakauer. 2009. "Adaptation to  
1532 Visuomotor Rotation Through Interaction Between Posterior Parietal and Motor Cortical  
1533 Areas." *Journal of Neurophysiology* 102 (5): 2921–32.
- 1534 Taylor, Jordan A., and Richard B. Ivry. 2014. "Chapter 9 - Cerebellar and Prefrontal Cortex  
1535 Contributions to Adaptation, Strategies, and Reinforcement Learning." In *Progress in Brain*  
1536 *Research*, edited by Narender Ramnani, 210:217–53. Elsevier.
- 1537 Taylor, Jordan A., Nola M. Klemfuss, and Richard B. Ivry. 2010. "An Explicit Strategy Prevails  
1538 When the Cerebellum Fails to Compute Movement Errors." *Cerebellum* 9 (4): 580–86.
- 1539 Therrien, Amanda S., and Amy J. Bastian. 2015. "Cerebellar Damage Impairs Internal  
1540 Predictions for Sensory and Motor Function." *Current Opinion in Neurobiology* 33 (August):  
1541 127–33.
- 1542 Therrien, Amanda S., Daniel M. Wolpert, and Amy J. Bastian. 2016. "Effective Reinforcement  
1543 Learning Following Cerebellar Damage Requires a Balance between Exploration and Motor  
1544 Noise." *Brain: A Journal of Neurology* 139 (Pt 1): 101–14.

- 1545 Torrecillos, Flavie, Philippe Albouy, Thomas Brochier, and Nicole Malfait. 2014. "Does the  
1546 Processing of Sensory and Reward-Prediction Errors Involve Common Neural Resources?  
1547 Evidence from a Frontocentral Negative Potential Modulated by Movement Execution  
1548 Errors." *The Journal of Neuroscience: The Official Journal of the Society for Neuroscience*  
1549 34 (14): 4845–56.
- 1550 Torta, Diana Maria Elena, Lorys Castelli, Maurizio Zibetti, Leonardo Lopiano, and Giuliano  
1551 Geminiani. 2009. "On the Role of Dopamine Replacement Therapy in Decision-Making,  
1552 Working Memory, and Reward in Parkinson's Disease: Does the Therapy-Dose Matter?"  
1553 *Brain and Cognition* 71 (2): 84–91.
- 1554 Tseng, Ya-Weng, Jörn Diedrichsen, John W. Krakauer, Reza Shadmehr, and Amy J. Bastian.  
1555 2007. "Sensory Prediction Errors Drive Cerebellum-Dependent Adaptation of Reaching."  
1556 *Journal of Neurophysiology* 98 (1): 54–62.
- 1557 Vezoli, Julien, and Emmanuel Procyk. 2009. "Frontal Feedback-Related Potentials in  
1558 Nonhuman Primates: Modulation during Learning and under Haloperidol." *The Journal of*  
1559 *Neuroscience: The Official Journal of the Society for Neuroscience* 29 (50): 15675–83.
- 1560 Vo, Andrew, Nole M. Hiebert, Ken N. Seergobin, Stephanie Solcz, Allison Partridge, and Penny  
1561 A. MacDonald. 2014. "Dopaminergic Medication Impairs Feedback-Based Stimulus-  
1562 Response Learning but Not Response Selection in Parkinson's Disease." *Frontiers in*  
1563 *Human Neuroscience* 8 (October): 784.
- 1564 Vo, Andrew, Ken N. Seergobin, and Penny A. MacDonald. 2017. "Effects of Levodopa on  
1565 Stimulus-Response Learning versus Response Selection in Healthy Young Adults."  
1566 *Behavioural Brain Research* 317 (January): 553–61.
- 1567 Vo, Andrew, Ken N. Seergobin, and Penny A. MacDonald. 2018. "Independent Effects of Age  
1568 and Levodopa on Reversal Learning in Healthy Volunteers." *Neurobiology of Aging* 69  
1569 (September): 129–39.
- 1570 Vo, Andrew, Ken N. Seergobin, Sarah A. Morrow, and Penny A. MacDonald. 2016. "Levodopa  
1571 Impairs Probabilistic Reversal Learning in Healthy Young Adults." *Psychopharmacology*  
1572 233 (14): 2753–63.
- 1573 Walsh, Matthew M., and John R. Anderson. 2012. "Learning from Experience: Event-Related  
1574 Potential Correlates of Reward Processing, Neural Adaptation, and Behavioral Choice."  
1575 *Neuroscience and Biobehavioral Reviews* 36 (8): 1870–84.
- 1576 Wang, Jane X., Zeb Kurth-Nelson, Dharshan Kumaran, Dhruva Tirumala, Hubert Soyer, Joel Z.  
1577 Leibo, Demis Hassabis, and Matthew Botvinick. 2018. "Prefrontal Cortex as a Meta-  
1578 Reinforcement Learning System." *Nature Neuroscience* 21 (6): 860–68.
- 1579 Warren, Christopher M., James M. Hyman, Jeremy K. Seamans, and Clay B. Holroyd. 2015.  
1580 "Feedback-Related Negativity Observed in Rodent Anterior Cingulate Cortex." *Journal of*  
1581 *Physiology, Paris* 109 (1-3): 87–94.
- 1582 Watabe-Uchida, Mitsuko, Neir Eshel, and Naoshige Uchida. 2017. "Neural Circuitry of Reward  
1583 Prediction Error." *Annual Review of Neuroscience* 40 (July): 373–94.
- 1584 Wolpert, D. M., Z. Ghahramani, and M. I. Jordan. 1995. "An Internal Model for Sensorimotor  
1585 Integration." *Science* 269 (5232): 1880–82.
- 1586 Wong, Aaron L., Cherie L. Marvel, Jordan A. Taylor, and John W. Krakauer. 2019. "Can  
1587 Patients with Cerebellar Disease Switch Learning Mechanisms to Reduce Their Adaptation  
1588 Deficits?" *Brain: A Journal of Neurology* 142 (3): 662–73.
